# Supplementary material for: A Network-Based Approach on Elucidating the Multi-Faceted Nature of Chronological Aging in S. cerevisiae
Source: PLoS One. 2011 Dec 21;6(12):e29284. doi: 10.1371/journal.pone.0029284 (PMC3244448; doi:10.1371/journal.pone.0029284)
Supplement: Table S3 — Protein-protein interactions of tCAN. (XLS) [file pone.0029284.s007.xls]

## Sheet: ppi tCAN
Table S3. Protein-protein interactions of tCAN
YER142C	Q0050
YPR140W	Q0050
Q0045	Q0105
YBL030C	Q0105
YDR375C	Q0105
Q0130	Q0130
YBL099W	Q0130
YJR045C	Q0130
Q0045	Q0250
YBL030C	Q0250
YBL045C	Q0250
YJR121W	Q0250
Q0045	Q0275
YJR121W	Q0275
YAL005C	YAL005C
YAL036C	YAL005C
YBR017C	YAL005C
YBR215W	YAL005C
YBR231C	YAL005C
YCR008W	YAL005C
YDR141C	YAL005C
YDR303C	YAL005C
YDR324C	YAL005C
YDR328C	YAL005C
YDR359C	YAL005C
YDR381W	YAL005C
YDR388W	YAL005C
YDR477W	YAL005C
YDR495C	YAL005C
YER103W	YAL005C
YFL007W	YAL005C
YFL044C	YAL005C
YFR004W	YAL005C
YFR031C	YAL005C
YFR037C	YAL005C
YGL206C	YAL005C
YGL207W	YAL005C
YGR173W	YAL005C
YHR117W	YAL005C
YIL016W	YAL005C
YIL043C	YAL005C
YIL053W	YAL005C
YIR002C	YAL005C
YIR010W	YAL005C
YLR189C	YAL005C
YLR293C	YAL005C
YLR347C	YAL005C
YLR384C	YAL005C
YML088W	YAL005C
YMR012W	YAL005C
YMR066W	YAL005C
YMR099C	YAL005C
YMR186W	YAL005C
YNL197C	YAL005C
YNR050C	YAL005C
YNR051C	YAL005C
YOR038C	YAL005C
YOR048C	YAL005C
YOR061W	YAL005C
YOR091W	YAL005C
YOR185C	YAL005C
YOR197W	YAL005C
YPL106C	YAL005C
YPL108W	YAL005C
YPL165C	YAL005C
YPL167C	YAL005C
YPL240C	YAL005C
YAL012W	YAL012W
YKL210W	YAL012W
YMR300C	YAL012W
YNR051C	YAL012W
YOL013C	YAL012W
YFR004W	YAL016W
YFR028C	YAL016W
YGR161C	YAL016W
YHR082C	YAL016W
YHR135C	YAL016W
YIL065C	YAL016W
YJR066W	YAL016W
YLR191W	YAL016W
YOL113W	YAL016W
YOR162C	YAL016W
YDL100C	YAL017W
YER133W	YAL017W
YDR331W	YAL018C
YHR026W	YAL018C
YHR114W	YAL018C
YIL171W	YAL018C
YLR034C	YAL018C
YMR001C	YAL018C
YAL019W	YAL019W
YBR160W	YAL019W
YJR119C	YAL019W
YLR027C	YAL019W
YOL045W	YAL019W
YGR103W	YAL025C
YIR010W	YAL025C
YML065W	YAL025C
YNR051C	YAL025C
YOR005C	YAL025C
YAL019W	YAL026C
YAL026C	YAL026C
YDL019C	YAL026C
YGL008C	YAL026C
YPR029C	YAL026C
YBR160W	YAL028W
YCR091W	YAL028W
YDL239C	YAL028W
YFR014C	YAL028W
YGL180W	YAL028W
YGR040W	YAL028W
YHL007C	YAL028W
YHR079C	YAL028W
YHR082C	YAL028W
YHR135C	YAL028W
YIL095W	YAL028W
YJL092W	YAL028W
YJL106W	YAL028W
YJL187C	YAL028W
YKL171W	YAL028W
YMR186W	YAL028W
YNL154C	YAL028W
YNL197C	YAL028W
YNL298W	YAL028W
YOL034W	YAL028W
YOR324C	YAL028W
YOR351C	YAL028W
YPL153C	YAL028W
YBL016W	YAL034C
YNL197C	YAL034C
YCR008W	YAL034W-A
YDL108W	YAL034W-A
YER018C	YAL034W-A
YHR135C	YAL034W-A
YIL144W	YAL034W-A
YIR010W	YAL034W-A
YJR112W	YAL034W-A
YKL171W	YAL034W-A
YNL154C	YAL034W-A
YPR046W	YAL034W-A
YDR152W	YAL036C
YIR010W	YAL036C
YNR051C	YAL036C
YAR002C-A	YAL042W
YBR229C	YAL042W
YGL158W	YAL042W
YHL007C	YAL042W
YIR010W	YAL042W
YPL218W	YAL042W
YPL240C	YAL042W
YAL047C	YAL047C
YDR439W	YAL047C
YEL061C	YAL047C
YFR028C	YAL047C
YHR158C	YAL047C
YLR179C	YAL047C
YLR429W	YAL047C
YMR001C	YAL047C
YNL209W	YAL047C
YOR373W	YAL047C
YDL025C	YAL049C
YAL051W	YAL051W
YOR363C	YAL051W
YLR049C	YAL054C
YNL189W	YAL054C
YAL059W	YAL059W
YAL061W	YAL060W
YER081W	YAL060W
YFR004W	YAL060W
YPL031C	YAL060W
YGL158W	YAL068C
YAR002C-A	YAR002C-A
YAR007C	YAR007C
YBL088C	YAR007C
YBR089C-A	YAR007C
YCR066W	YAR007C
YCR092C	YAR007C
YDL156W	YAR007C
YDR013W	YAR007C
YDR121W	YAR007C
YER095W	YAR007C
YFL013C	YAR007C
YFR013W	YAR007C
YGL116W	YAR007C
YGL207W	YAR007C
YHR164C	YAR007C
YIR002C	YAR007C
YIR010W	YAR007C
YJL165C	YAR007C
YNR051C	YAR007C
YOR304W	YAR007C
YBL084C	YAR018C
YBL106C	YAR018C
YDL214C	YAR018C
YIL144W	YAR018C
YJL092W	YAR018C
YJR059W	YAR018C
YKL166C	YAR018C
YOL113W	YAR018C
YPL055C	YAR018C
YHL048W	YAR023C
YAR027W	YAR027W
YAR028W	YAR027W
YBR042C	YAR027W
YDR411C	YAR027W
YGR060W	YAR027W
YJR013W	YAR027W
YJR044C	YAR027W
YLR018C	YAR027W
YLR214W	YAR027W
YNL263C	YAR027W
YOL129W	YAR027W
YPL020C	YAR027W
YPR159C-A	YAR027W
YAR028W	YAR028W
YDR331W	YAR028W
YHR026W	YAR028W
YPL264C	YAR028W
YAR033W	YAR033W
YHL048W	YAR033W
YAL054C	YAR035W
YER024W	YAR035W
YAR042W	YAR042W
YDL019C	YAR042W
YLR191W	YAR042W
YNL197C	YAR042W
YBL001C	YBL001C
YML102W	YBL001C
YAL005C	YBL005W
YCR088W	YBL005W
YGL013C	YBL005W
YPL240C	YBL005W
YBL007C	YBL007C
YBL105C	YBL007C
YBR059C	YBL007C
YBR160W	YBL007C
YCL034W	YBL007C
YCR088W	YBL007C
YDL214C	YBL007C
YER125W	YBL007C
YER133W	YBL007C
YGL181W	YBL007C
YGR040W	YBL007C
YHR016C	YBL007C
YHR079C	YBL007C
YHR135C	YBL007C
YIL095W	YBL007C
YJL095W	YBL007C
YJL106W	YBL007C
YKR001C	YBL007C
YLR248W	YBL007C
YNL154C	YBL007C
YNL238W	YBL007C
YOR351C	YBL007C
YPL141C	YBL007C
YPL153C	YBL007C
YBL008W	YBL008W
YBR215W	YBL008W
YOR038C	YBL008W
YBL016W	YBL016W
YDL159W	YBL016W
YER020W	YBL016W
YFR004W	YBL016W
YGL158W	YBL016W
YGL178W	YBL016W
YLR362W	YBL016W
YNL053W	YBL016W
YDL140C	YBL020W
YGL011C	YBL020W
YGR040W	YBL022C
YAL005C	YBL023C
YAR007C	YBL023C
YBL016W	YBL023C
YBL023C	YBL023C
YBR126C	YBL023C
YBR202W	YBL023C
YCL061C	YBL023C
YDL017W	YBL023C
YDR013W	YBL023C
YDR122W	YBL023C
YGR040W	YBL023C
YJL194W	YBL023C
YLR096W	YBL023C
YLR274W	YBL023C
YMR048W	YBL023C
YMR314W	YBL023C
YOR080W	YBL023C
YPL031C	YBL023C
YPL150W	YBL023C
YPR019W	YBL023C
YBR160W	YBL024W
YDL214C	YBL024W
YFR004W	YBL024W
YGL158W	YBL024W
YGL180W	YBL024W
YGR040W	YBL024W
YHR082C	YBL024W
YHR135C	YBL024W
YIL035C	YBL024W
YIL095W	YBL024W
YJL095W	YBL024W
YKL116C	YBL024W
YLR096W	YBL024W
YNL154C	YBL024W
YNR051C	YBL024W
YOL113W	YBL024W
YPL031C	YBL024W
YPL150W	YBL024W
YPL153C	YBL024W
YKR036C	YBL029W
YBR017C	YBL030C
YDR328C	YBL030C
YFR004W	YBL030C
YGL167C	YBL030C
YGR254W	YBL030C
YHR082C	YBL030C
YIR010W	YBL030C
YML065W	YBL030C
YNR051C	YBL030C
YOR117W	YBL030C
YBL034C	YBL034C
YBL097W	YBL034C
YGR188C	YBL034C
YBL007C	YBL037W
YBL105C	YBL037W
YJR005W	YBL037W
YNL197C	YBL037W
YBR173C	YBL041W
YFR004W	YBL041W
YML092C	YBL041W
YOL038W	YBL041W
YDR118W	YBL043W
YJR112W	YBL043W
YKR083C	YBL043W
YMR117C	YBL043W
YMR224C	YBL044W
YBL030C	YBL045C
YBL045C	YBL045C
YDR388W	YBL045C
YFR004W	YBL045C
YLR132C	YBL045C
YLR442C	YBL045C
YMR036C	YBL045C
YOR125C	YBL045C
YPL204W	YBL045C
YPR054W	YBL045C
YPR191W	YBL045C
YBR274W	YBL052C
YDR121W	YBL052C
YGL207W	YBL052C
YOR064C	YBL052C
YBL016W	YBL055C
YDR477W	YBL055C
YFR014C	YBL055C
YGL180W	YBL055C
YHR135C	YBL055C
YJL164C	YBL055C
YNL154C	YBL055C
YOR052C	YBL055C
YPL209C	YBL055C
YGL070C	YBL059W
YDR477W	YBL061C
YGL180W	YBL061C
YHR082C	YBL061C
YHR135C	YBL061C
YJL164C	YBL061C
YJL187C	YBL061C
YNL154C	YBL061C
YPL031C	YBL061C
YBR160W	YBL063W
YBL064C	YBL064C
YFR014C	YBL064C
YHR079C	YBL064C
YHR082C	YBL064C
YKL086W	YBL064C
YLR318W	YBL064C
YNL154C	YBL064C
YPL031C	YBL064C
YJL141C	YBL066C
YNL197C	YBL066C
YHR030C	YBL068W
YOL061W	YBL068W
YLR384C	YBL071W-A
YNL197C	YBL071W-A
YAL005C	YBL075C
YDR044W	YBL075C
YDR128W	YBL075C
YEL037C	YBL075C
YER103W	YBL075C
YFR004W	YBL075C
YLR320W	YBL075C
YLR362W	YBL075C
YNL215W	YBL075C
YNL250W	YBL075C
YPL240C	YBL075C
YFR014C	YBL078C
YGL180W	YBL078C
YHR082C	YBL078C
YHR135C	YBL078C
YHR171W	YBL078C
YOL082W	YBL078C
YPL031C	YBL078C
YBL081W	YBL081W
YDL167C	YBL081W
YNL197C	YBL081W
YBL084C	YBL084C
YBR054W	YBL084C
YBR160W	YBL084C
YDR118W	YBL084C
YDR260C	YBL084C
YGL116W	YBL084C
YHR166C	YBL084C
YMR001C	YBL084C
YNL172W	YBL084C
YPL031C	YBL084C
YAL019W	YBL088C
YBL007C	YBL088C
YNL197C	YBL091C-A
YOL113W	YBL091C-A
YDR325W	YBL097W
YDR439W	YBL097W
YCR063W	YBL099W
YFR004W	YBL099W
YGR281W	YBL099W
YIR010W	YBL099W
YJR121W	YBL099W
YLR052W	YBL099W
YOR117W	YBL099W
YBR112C	YBL103C
YHR079C	YBL103C
YNL076W	YBL103C
YOL108C	YBL103C
YPL240C	YBL103C
YDR316W	YBL104C
YIR010W	YBL104C
YLR096W	YBL104C
YMR186W	YBL104C
YNL197C	YBL104C
YOR080W	YBL104C
YPL055C	YBL104C
YPL204W	YBL104C
YPL240C	YBL104C
YBR160W	YBL105C
YBR166C	YBL105C
YER165W	YBL105C
YGR229C	YBL105C
YHR070W	YBL105C
YIL143C	YBL105C
YML109W	YBL105C
YMR219W	YBL105C
YNL154C	YBL105C
YOL100W	YBL105C
YPL151C	YBL105C
YFL013C	YBL106C
YDR001C	YBR001C
YFR014C	YBR001C
YHR102W	YBR001C
YBR006W	YBR006W
YMR127C	YBR007C
YDR062W	YBR017C
YFR004W	YBR017C
YGR005C	YBR017C
YLR293C	YBR017C
YOR374W	YBR017C
YAL026C	YBR023C
YBL061C	YBR023C
YBR023C	YBR023C
YDR153C	YBR023C
YJL099W	YBR023C
YJR125C	YBR023C
YLR330W	YBR023C
YDL229W	YBR026C
YDL101C	YBR035C
YDL214C	YBR035C
YFL033C	YBR035C
YFR004W	YBR035C
YJR059W	YBR035C
YPL240C	YBR035C
YBR160W	YBR038W
YBR041W	YBR041W
YDL153C	YBR041W
YOR317W	YBR041W
YER081W	YBR042C
YHL007C	YBR042C
YJL092W	YBR042C
YJL164C	YBR042C
YNL154C	YBR042C
YPL031C	YBR042C
YBR221C	YBR044C
YHR042W	YBR044C
YNL172W	YBR046C
YDR238C	YBR047W
YFR004W	YBR053C
YBR054W	YBR054W
YDL013W	YBR054W
YPL263C	YBR054W
YBL105C	YBR059C
YBR059C	YBR059C
YFR004W	YBR059C
YFR014C	YBR059C
YIL095W	YBR059C
YIR010W	YBR059C
YJR059W	YBR059C
YKL166C	YBR059C
YML014W	YBR059C
YPL055C	YBR059C
YBR061C	YBR061C
YNL298W	YBR061C
YHL007C	YBR063C
YNL250W	YBR065C
YPL151C	YBR065C
YJR066W	YBR078W
YBR080C	YBR080C
YDR363W-A	YBR080C
YFR004W	YBR080C
YJL030W	YBR080C
YKL196C	YBR080C
YNL189W	YBR080C
YNL288W	YBR080C
YDR328C	YBR085W
YFR004W	YBR085W
YGL167C	YBR085W
YHR002W	YBR085W
YHR135C	YBR085W
YDL164C	YBR087W
YFR027W	YBR087W
YHR191C	YBR087W
YIR010W	YBR087W
YJR068W	YBR087W
YMR031C	YBR087W
YOR144C	YBR087W
YIR010W	YBR089C-A
YJL140W	YBR089C-A
YML065W	YBR089C-A
YHR135C	YBR090C
YBR091C	YBR091C
YHR005C-A	YBR091C
YKL195W	YBR091C
YKR009C	YBR094W
YPL031C	YBR094W
YPL240C	YBR094W
YLR240W	YBR097W
YMR135C	YBR105C
YNL197C	YBR105C
YAR002C-A	YBR106W
YAR027W	YBR106W
YBR106W	YBR106W
YBR110W	YBR106W
YBR243C	YBR106W
YBR287W	YBR106W
YCL038C	YBR106W
YDL128W	YBR106W
YDR297W	YBR106W
YDR307W	YBR106W
YDR331W	YBR106W
YDR414C	YBR106W
YEL027W	YBR106W
YER039C	YBR106W
YFR004W	YBR106W
YGL051W	YBR106W
YGL055W	YBR106W
YGL167C	YBR106W
YHL042W	YBR106W
YHL048W	YBR106W
YHR026W	YBR106W
YHR140W	YBR106W
YIL048W	YBR106W
YIL171W	YBR106W
YJL108C	YBR106W
YJR015W	YBR106W
YJR124C	YBR106W
YLR034C	YBR106W
YML075C	YBR106W
YMR058W	YBR106W
YMR215W	YBR106W
YMR279C	YBR106W
YNL048W	YBR106W
YOL020W	YBR106W
YOL030W	YBR106W
YOL132W	YBR106W
YOR117W	YBR106W
YPL240C	YBR106W
YPL264C	YBR106W
YAL034W-A	YBR107C
YCR008W	YBR107C
YGR052W	YBR107C
YIR010W	YBR107C
YPR046W	YBR107C
YBR110W	YBR110W
YDR307W	YBR110W
YDR331W	YBR110W
YGR060W	YBR110W
YHL048W	YBR110W
YHR026W	YBR110W
YHR140W	YBR110W
YLR241W	YBR110W
YMR058W	YBR110W
YMR215W	YBR110W
YPL264C	YBR110W
YBR111W-A	YBR111W-A
YHR099W	YBR111W-A
YOR257W	YBR111W-A
YPL047W	YBR111W-A
YPL082C	YBR111W-A
YBR112C	YBR112C
YER018C	YBR112C
YFR004W	YBR112C
YGL162W	YBR112C
YIL021W	YBR112C
YKL038W	YBR112C
YPL181W	YBR112C
YDR097C	YBR114W
YMR201C	YBR114W
YML102W	YBR117C
YBR126C	YBR126C
YDL017W	YBR126C
YFL033C	YBR126C
YFR004W	YBR126C
YFR028C	YBR126C
YLL019C	YBR126C
YML100W	YBR126C
YMR106C	YBR126C
YMR261C	YBR126C
YOR089C	YBR126C
YBR001C	YBR127C
YDL185W	YBR127C
YDR202C	YBR127C
YER036C	YBR127C
YFL039C	YBR127C
YFR004W	YBR127C
YGR155W	YBR127C
YGR281W	YBR127C
YIR010W	YBR127C
YJR069C	YBR127C
YML121W	YBR127C
YNL239W	YBR127C
YNR051C	YBR127C
YOR117W	YBR127C
YOR189W	YBR127C
YPL151C	YBR127C
YIL095W	YBR129C
YBR133C	YBR133C
YCR088W	YBR133C
YGL187C	YBR133C
YHL007C	YBR133C
YJL187C	YBR133C
YPL031C	YBR133C
YPL209C	YBR133C
YAR007C	YBR136W
YBL007C	YBR136W
YCL061C	YBR136W
YDL101C	YBR136W
YDR097C	YBR136W
YHR114W	YBR136W
YMR259C	YBR136W
YOR210W	YBR136W
YPL153C	YBR136W
YAR007C	YBR137W
YBR137W	YBR137W
YNL189W	YBR137W
YBL007C	YBR150C
YDR388W	YBR150C
YOL089C	YBR150C
YHR082C	YBR151W
YPL031C	YBR151W
YJL164C	YBR157C
YJR059W	YBR157C
YKR083C	YBR157C
YAL005C	YBR159W
YAR027W	YBR159W
YAR028W	YBR159W
YBR054W	YBR159W
YBR110W	YBR159W
YCR011C	YBR159W
YDL206W	YBR159W
YDR297W	YBR159W
YDR307W	YBR159W
YDR331W	YBR159W
YDR414C	YBR159W
YFL062W	YBR159W
YFR004W	YBR159W
YGL055W	YBR159W
YGR060W	YBR159W
YHL042W	YBR159W
YHL048W	YBR159W
YHR026W	YBR159W
YHR082C	YBR159W
YHR140W	YBR159W
YJR015W	YBR159W
YJR161C	YBR159W
YKL008C	YBR159W
YLR056W	YBR159W
YLR241W	YBR159W
YLR292C	YBR159W
YML075C	YBR159W
YMR058W	YBR159W
YMR215W	YBR159W
YMR279C	YBR159W
YNL048W	YBR159W
YNR070W	YBR159W
YOL132W	YBR159W
YPL264C	YBR159W
YPR003C	YBR159W
YFR004W	YBR160W
YGL166W	YBR160W
YHR030C	YBR160W
YJL095W	YBR160W
YJL157C	YBR160W
YJL187C	YBR160W
YJR076C	YBR160W
YKL161C	YBR160W
YKL185W	YBR160W
YML065W	YBR160W
YMR001C	YBR160W
YNL197C	YBR160W
YBR166C	YBR166C
YHR150W	YBR168W
YLR324W	YBR168W
YBR170C	YBR170C
YBR201W	YBR170C
YDL190C	YBR170C
YDR411C	YBR170C
YFL044C	YBR170C
YHR082C	YBR170C
YML013W	YBR170C
YGL011C	YBR173C
YGL048C	YBR173C
YMR037C	YBR173C
YPL031C	YBR173C
YPR103W	YBR173C
YBR179C	YBR179C
YJL092W	YBR179C
YKL116C	YBR179C
YML102W	YBR195C
YNL183C	YBR195C
YPL022W	YBR195C
YPR018W	YBR195C
YAL034C	YBR198C
YBR111W-A	YBR198C
YBR198C	YBR198C
YCL010C	YBR198C
YER164W	YBR198C
YGL158W	YBR198C
YGR252W	YBR198C
YGR274C	YBR198C
YHR099W	YBR198C
YIR010W	YBR198C
YPL082C	YBR198C
YPR072W	YBR198C
YBR201W	YBR201W
YGR048W	YBR201W
YOL013C	YBR201W
YBR202W	YBR202W
YDL017W	YBR202W
YDL029W	YBR202W
YJL194W	YBR202W
YLR274W	YBR202W
YMR048W	YBR202W
YPR019W	YBR202W
YBL007C	YBR205W
YBR017C	YBR205W
YDR170C	YBR205W
YDR346C	YBR205W
YFL038C	YBR205W
YHR016C	YBR205W
YHR114W	YBR205W
YBR212W	YBR212W
YDL167C	YBR212W
YHR082C	YBR212W
YKL171W	YBR212W
YAR007C	YBR215W
YFR004W	YBR216C
YIR037W	YBR216C
YDR430C	YBR221C
YER178W	YBR221C
YFL018C	YBR221C
YIR010W	YBR221C
YLR166C	YBR221C
YML059C	YBR221C
YML065W	YBR221C
YMR308C	YBR221C
YBR222C	YBR222C
YDL006W	YBR222C
YER125W	YBR222C
YFR004W	YBR222C
YPL209C	YBR222C
YMR106C	YBR228W
YBR231C	YBR231C
YJL187C	YBR231C
YMR001C	YBR231C
YDR388W	YBR239C
YHR016C	YBR239C
YNL197C	YBR239C
YBR052C	YBR244W
YAR007C	YBR245C
YBR089C-A	YBR245C
YDR190C	YBR245C
YER164W	YBR245C
YGR274C	YBR245C
YIR010W	YBR245C
YJR060W	YBR245C
YLR163C	YBR245C
YOR304W	YBR245C
YPL055C	YBR245C
YPL082C	YBR245C
YFR004W	YBR248C
YLR401C	YBR248C
YER018C	YBR249C
YFR004W	YBR249C
YFR034C	YBR249C
YGR275W	YBR249C
YNR051C	YBR249C
YPL150W	YBR249C
YIL106W	YBR255W
YBL016W	YBR259W
YBR126C	YBR265W
YHR082C	YBR265W
YFR004W	YBR272C
YGR040W	YBR272C
YML065W	YBR272C
YOR117W	YBR272C
YBR274W	YBR274W
YDL132W	YBR280C
YPL031C	YBR287W
YBR288C	YBR288C
YLL005C	YBR291C
YOL028C	YCL004W
YBR111W-A	YCL010C
YER164W	YCL010C
YGL158W	YCL010C
YPL047W	YCL010C
YBR160W	YCL014W
YCR002C	YCL014W
YEL023C	YCL014W
YGL180W	YCL014W
YGR229C	YCL014W
YHR135C	YCL014W
YJL164C	YCL014W
YPL031C	YCL014W
YPL153C	YCL014W
YPL240C	YCL014W
YCL028W	YCL028W
YDR128W	YCL028W
YDR260C	YCL028W
YER125W	YCL028W
YHR114W	YCL028W
YIL066C	YCL028W
YIR010W	YCL028W
YNL189W	YCL028W
YNL288W	YCL028W
YNL290W	YCL028W
YNR051C	YCL028W
YOL094C	YCL028W
YCL029C	YCL029C
YER139C	YCL029C
YFR014C	YCL029C
YGL180W	YCL029C
YHR135C	YCL029C
YJL187C	YCL029C
YJR066W	YCL029C
YJR112W	YCL029C
YHR016C	YCL034W
YHR114W	YCL034W
YDR388W	YCL036W
YBR054W	YCL038C
YNL290W	YCL042W
YPL240C	YCL048W
YDL157C	YCL056C
YIL065C	YCL056C
YJL185C	YCL056C
YOR037W	YCL056C
YOR080W	YCL061C
YPL153C	YCL061C
YPR019W	YCL061C
YPR175W	YCL061C
YGR245C	YCL064C
YNR051C	YCL064C
YCR002C	YCR002C
YDR324C	YCR002C
YHR107C	YCR002C
YIR010W	YCR002C
YJR076C	YCR002C
YLR229C	YCR002C
YLR314C	YCR002C
YNL298W	YCR002C
YPL153C	YCR002C
YCR005C	YCR005C
YNL154C	YCR011C
YAR007C	YCR012W
YCR012W	YCR012W
YER133W	YCR012W
YFR004W	YCR012W
YGR252W	YCR012W
YIL128W	YCR012W
YIR010W	YCR012W
YJL030W	YCR012W
YML072C	YCR012W
YNR051C	YCR012W
YOR117W	YCR012W
YPL240C	YCR012W
YDR363W-A	YCR014C
YHR135C	YCR014C
YGR163W	YCR015C
YCR017C	YCR017C
YGR052W	YCR017C
YBL029C-A	YCR021C
YJR059W	YCR023C
YOL057W	YCR032W
YPL055C	YCR033W
YFR004W	YCR036W
YDL017W	YCR050C
YFR004W	YCR051W
YFR004W	YCR053W
YLR314C	YCR053W
YML126C	YCR053W
YOL013C	YCR053W
YCR063W	YCR063W
YDL209C	YCR063W
YCR066W	YCR066W
YGL058W	YCR066W
YJL092W	YCR066W
YOR368W	YCR066W
YNL197C	YCR067C
YCR012W	YCR077C
YCR077C	YCR077C
YDL160C	YCR077C
YDR381W	YCR077C
YDR404C	YCR077C
YER018C	YCR077C
YFR036W	YCR077C
YGR218W	YCR077C
YHR166C	YCR077C
YIR010W	YCR077C
YJL140W	YCR077C
YMR117C	YCR077C
YNR051C	YCR077C
YPL240C	YCR077C
YAL051W	YCR087C-A
YDR398W	YCR087C-A
YIR010W	YCR087C-A
YPL022W	YCR087C-A
YDL029W	YCR088W
YDR388W	YCR088W
YFR004W	YCR088W
YGL206C	YCR088W
YHR016C	YCR088W
YIL095W	YCR088W
YPL204W	YCR088W
YCL056C	YCR092C
YDR097C	YCR092C
YPL055C	YCR092C
YCR093W	YCR093W
YDL149W	YCR093W
YDL165W	YCR093W
YER148W	YCR093W
YIR010W	YCR093W
YJL141C	YCR093W
YKR036C	YCR093W
YNR051C	YCR093W
YNR052C	YCR093W
YPL042C	YCR093W
YPL235W	YCR093W
YPR072W	YCR093W
YHL029C	YCR095C
YNL032W	YCR095C
YBL007C	YCR100C
YDR414C	YCR100C
YHL007C	YCR100C
YPL141C	YCR100C
YNL134C	YCR102C
YDR222W	YCR106W
YEL072W	YCR106W
YGL247W	YCR106W
YJL077W-B	YCR106W
YMR060C	YCR106W
YPL034W	YCR106W
YPL240C	YCR106W
YPR046W	YCR106W
YNL197C	YCR107W
YDL133W	YDL001W
YIL095W	YDL001W
YJL164C	YDL001W
YCR091W	YDL006W
YDL006W	YDL006W
YDL132W	YDL006W
YFR014C	YDL006W
YGR052W	YDL006W
YHL007C	YDL006W
YHR079C	YDL006W
YJL095W	YDL006W
YJL106W	YDL006W
YLR148W	YDL006W
YMR001C	YDL006W
YNL154C	YDL006W
YNL298W	YDL006W
YOL113W	YDL006W
YPL031C	YDL006W
YPL141C	YDL006W
YPL161C	YDL006W
YPL180W	YDL006W
YAR007C	YDL007W
YBR272C	YDL007W
YCR014C	YDL007W
YDL020C	YDL007W
YDR363W-A	YDL007W
YDR394W	YDL007W
YEL037C	YDL007W
YFR004W	YDL007W
YGL048C	YDL007W
YHR082C	YDL007W
YDL010W	YDL010W
YER125W	YDL012C
YBL063W	YDL013W
YDL013W	YDL013W
YDL042C	YDL013W
YER018C	YDL013W
YER116C	YDL013W
YGL180W	YDL013W
YHR082C	YDL013W
YHR134W	YDL013W
YHR135C	YDL013W
YIL095W	YDL013W
YJL092W	YDL013W
YJR089W	YDL013W
YKL116C	YDL013W
YML023C	YDL013W
YMR216C	YDL013W
YNL154C	YDL013W
YPL082C	YDL013W
YPL209C	YDL013W
YBR160W	YDL017W
YDL017W	YDL017W
YDL132W	YDL017W
YDR439W	YDL017W
YIR010W	YDL017W
YMR001C	YDL017W
YPL153C	YDL017W
YPR019W	YDL017W
YAL005C	YDL019C
YHR082C	YDL019C
YHR135C	YDL019C
YJL095W	YDL019C
YMR109W	YDL019C
YNL154C	YDL019C
YPL153C	YDL019C
YBL041W	YDL020C
YGL058W	YDL020C
YPR103W	YDL020C
YPR175W	YDL020C
YBR160W	YDL025C
YDR477W	YDL025C
YGL180W	YDL025C
YHR082C	YDL025C
YHR135C	YDL025C
YJL095W	YDL025C
YJL164C	YDL025C
YPL240C	YDL025C
YAR007C	YDL029W
YDR143C	YDL029W
YDR260C	YDL029W
YDR394W	YDL029W
YDR523C	YDL029W
YEL037C	YDL029W
YFR004W	YDL029W
YHR030C	YDL029W
YIL066C	YDL029W
YIL095W	YDL029W
YIR006C	YDL029W
YJR065C	YDL029W
YLR370C	YDL029W
YMR109W	YDL029W
YNL189W	YDL029W
YNR051C	YDL029W
YNL197C	YDL037C
YBR202W	YDL042C
YBR274W	YDL042C
YDL042C	YDL042C
YGR052W	YDL042C
YIL035C	YDL042C
YLR274W	YDL042C
YML109W	YDL042C
YNL197C	YDL042C
YOR061W	YDL042C
YPL240C	YDL042C
YPR010C	YDL042C
YBR111W-A	YDL053C
YCR008W	YDL053C
YDR207C	YDL053C
YFL007W	YDL053C
YFR013W	YDL053C
YGL203C	YDL053C
YHR135C	YDL053C
YIL106W	YDL053C
YIR010W	YDL053C
YLR362W	YDL053C
YNR051C	YDL053C
YPL042C	YDL053C
YPL209C	YDL053C
YPR175W	YDL053C
YDR170C	YDL055C
YER095W	YDL055C
YFR004W	YDL055C
YGR204W	YDL055C
YGR218W	YDL055C
YGR234W	YDL055C
YHL011C	YDL055C
YIL070C	YDL055C
YJL074C	YDL055C
YJR109C	YDL055C
YKL029C	YDL055C
YKL067W	YDL055C
YLR153C	YDL055C
YLR166C	YDL055C
YNR016C	YDL055C
YNR051C	YDL055C
YOR117W	YDL055C
YPL226W	YDL055C
YER036C	YDL066W
YFR004W	YDL066W
YGL187C	YDL066W
YMR173W	YDL066W
YNL207W	YDL066W
YPL109C	YDL066W
YBL030C	YDL067C
YFR004W	YDL072C
YKL065C	YDL072C
YER018C	YDL073W
YDL074C	YDL074C
YGL058W	YDL074C
YJL165C	YDL074C
YOR365C	YDL074C
YPL141C	YDL074C
YDR207C	YDL076C
YKL185W	YDL076C
YMR168C	YDL076C
YPL082C	YDL076C
YJR059W	YDL078C
YOL147C	YDL078C
YPL209C	YDL078C
YPL240C	YDL078C
YDL084W	YDL084W
YDR381W	YDL084W
YFR004W	YDL084W
YHR102W	YDL084W
YIL021W	YDL084W
YMR314W	YDL084W
YNR051C	YDL084W
YOR117W	YDL084W
YBL020W	YDL085W
YHR204W	YDL085W
YKL093W	YDL085W
YPR054W	YDL085W
YDL099W	YDL099W
YHR135C	YDL099W
YJL164C	YDL099W
YDL100C	YDL100C
YDL121C	YDL100C
YER017C	YDL100C
YFR004W	YDL100C
YGR189C	YDL100C
YIL065C	YDL100C
YJL153C	YDL100C
YKR100C	YDL100C
YLR297W	YDL100C
YNL149C	YDL100C
YNR067C	YDL100C
YOR117W	YDL100C
YBL088C	YDL101C
YDR030C	YDL101C
YER125W	YDL101C
YHR135C	YDL101C
YJL092W	YDL101C
YNL250W	YDL101C
YPL022W	YDL101C
YPL153C	YDL101C
YML023C	YDL105W
YBR160W	YDL106C
YDR146C	YDL106C
YFR034C	YDL106C
YBR160W	YDL108W
YDR146C	YDL108W
YNL197C	YDL110C
YDL112W	YDL112W
YGL179C	YDL115C
YGL180W	YDL115C
YHR135C	YDL115C
YJL187C	YDL115C
YJR059W	YDL117W
YKR009C	YDL117W
YNL197C	YDL117W
YBL078C	YDL126C
YBR170C	YDL126C
YBR201W	YDL126C
YDL126C	YDL126C
YDR411C	YDL126C
YEL037C	YDL126C
YFL044C	YDL126C
YFR004W	YDL126C
YGL108C	YDL126C
YGR048W	YDL126C
YIR010W	YDL126C
YJR059W	YDL126C
YKL039W	YDL126C
YKL145W	YDL126C
YKR083C	YDL126C
YMR001C	YDL126C
YNL041C	YDL126C
YNR051C	YDL126C
YOR117W	YDL126C
YOR197W	YDL126C
YGR040W	YDL128W
YKL116C	YDL128W
YLR248W	YDL128W
YNL154C	YDL128W
YPL150W	YDL128W
YFR028C	YDL129W
YDL131W	YDL131W
YDL214C	YDL131W
YFR004W	YDL131W
YFR034C	YDL131W
YHR079C	YDL131W
YHR082C	YDL131W
YOL113W	YDL131W
YOR117W	YDL131W
YPL031C	YDL131W
YPL240C	YDL131W
YDL126C	YDL132W
YJL149W	YDL132W
YJR090C	YDL132W
YLR097C	YDL132W
YLR368W	YDL132W
YAL005C	YDL140C
YAR007C	YDL140C
YBR111W-A	YDL140C
YBR160W	YDL140C
YCL028W	YDL140C
YDL108W	YDL140C
YDL115C	YDL140C
YDL140C	YDL140C
YDR359C	YDL140C
YDR404C	YDL140C
YEL037C	YDL140C
YFR004W	YDL140C
YGL058W	YDL140C
YGL070C	YDL140C
YGR005C	YDL140C
YGR186W	YDL140C
YGR274C	YDL140C
YHR099W	YDL140C
YHR135C	YDL140C
YIL021W	YDL140C
YIR010W	YDL140C
YJL164C	YDL140C
YKL054C	YDL140C
YKL210W	YDL140C
YLR005W	YDL140C
YLR430W	YDL140C
YML088W	YDL140C
YMR075W	YDL140C
YMR201C	YDL140C
YMR223W	YDL140C
YMR277W	YDL140C
YNL197C	YDL140C
YOR151C	YDL140C
YPL042C	YDL140C
YPL082C	YDL140C
YPR056W	YDL140C
YBL007C	YDL146W
YHR016C	YDL146W
YHR114W	YDL146W
YDL149W	YDL149W
YFR028C	YDL149W
YHL007C	YDL149W
YHR082C	YDL149W
YLR065C	YDL149W
YNL154C	YDL149W
YNL298W	YDL149W
YOR061W	YDL149W
YAL017W	YDL153C
YBL016W	YDL153C
YBR160W	YDL153C
YCR091W	YDL153C
YDL153C	YDL153C
YDL214C	YDL153C
YGL158W	YDL153C
YGL180W	YDL153C
YGR040W	YDL153C
YGR052W	YDL153C
YHL007C	YDL153C
YHR079C	YDL153C
YHR082C	YDL153C
YHR135C	YDL153C
YIL095W	YDL153C
YIR010W	YDL153C
YJL106W	YDL153C
YJL164C	YDL153C
YJR119C	YDL153C
YKL035W	YDL153C
YKL171W	YDL153C
YML065W	YDL153C
YMR117C	YDL153C
YNL154C	YDL153C
YNL298W	YDL153C
YOL113W	YDL153C
YPL153C	YDL153C
YPL204W	YDL153C
YDR097C	YDL156W
YIR010W	YDL156W
YDL159W	YDL159W
YFR028C	YDL159W
YGR040W	YDL159W
YIR010W	YDL159W
YLR362W	YDL159W
YBR111W-A	YDL160C
YCR093W	YDL160C
YDL017W	YDL160C
YDL160C	YDL160C
YDR170C	YDL160C
YFR004W	YDL160C
YGR253C	YDL160C
YIL106W	YDL160C
YMR106C	YDL160C
YNL197C	YDL160C
YNR051C	YDL160C
YNR052C	YDL160C
YOR326W	YDL160C
YGL206C	YDL161W
YHR016C	YDL161W
YIL095W	YDL161W
YOR111W	YDL161W
YKL113C	YDL164C
YCR077C	YDL165W
YDL165W	YDL165W
YER018C	YDL165W
YER148W	YDL165W
YKL002W	YDL165W
YKL166C	YDL165W
YNL288W	YDL165W
YNR051C	YDL165W
YPL042C	YDL165W
YDL108W	YDL166C
YHR082C	YDL166C
YHR135C	YDL166C
YIL095W	YDL166C
YDL167C	YDL167C
YBL023C	YDL171C
YFR004W	YDL171C
YFR034C	YDL171C
YJL141C	YDL171C
YLR166C	YDL171C
YMR117C	YDL171C
YPL031C	YDL171C
YBL030C	YDL174C
YBR160W	YDL174C
YJR104C	YDL176W
YMR135C	YDL176W
YNL197C	YDL180W
YDL131W	YDL182W
YDL182W	YDL182W
YFR004W	YDL182W
YFR034C	YDL182W
YNL197C	YDL182W
YOR117W	YDL182W
YDR202C	YDL185W
YDR328C	YDL185W
YDR381W	YDL185W
YEL023C	YDL185W
YFR004W	YDL185W
YIL128W	YDL185W
YIL144W	YDL185W
YJR035W	YDL185W
YKL029C	YDL185W
YKL048C	YDL185W
YLL019C	YDL185W
YLR052W	YDL185W
YLR442C	YDL185W
YML095C	YDL185W
YMR104C	YDL185W
YNL250W	YDL185W
YNL313C	YDL185W
YNR051C	YDL185W
YNR052C	YDL185W
YOR117W	YDL185W
YHR079C	YDL186W
YMR001C	YDL186W
YPL031C	YDL186W
YDL126C	YDL190C
YDR479C	YDL190C
YEL037C	YDL190C
YFL044C	YDL190C
YJL030W	YDL190C
YPL240C	YDL190C
YCL056C	YDL197C
YLR442C	YDL197C
YPL240C	YDL197C
YAR027W	YDL198C
YBL030C	YDL198C
YCL056C	YDL198C
YDL085W	YDL198C
YDR414C	YDL198C
YGR040W	YDL198C
YML065W	YDL198C
YBL007C	YDL203C
YER125W	YDL203C
YLR096W	YDL203C
YPL031C	YDL203C
YPL240C	YDL203C
YBR017C	YDL204W
YDL204W	YDL204W
YNL154C	YDL204W
YBL007C	YDL206W
YBR110W	YDL206W
YNL197C	YDL206W
YBR065C	YDL209C
YOL113W	YDL209C
YKL171W	YDL215C
YLR320W	YDL215C
YLR432W	YDL215C
YML131W	YDL215C
YOL034W	YDL215C
YPR048W	YDL215C
YBL029C-A	YDL222C
YBR052C	YDL222C
YBR244W	YDL222C
YCR021C	YDL222C
YDL222C	YDL222C
YFL039C	YDL226C
YFR004W	YDL226C
YAL005C	YDL229W
YBL075C	YDL229W
YDR122W	YDL229W
YDR141C	YDL229W
YDR153C	YDL229W
YDR186C	YDL229W
YDR299W	YDL229W
YDR324C	YDL229W
YDR347W	YDL229W
YDR359C	YDL229W
YDR381W	YDL229W
YDR395W	YDL229W
YER103W	YDL229W
YER147C	YDL229W
YER164W	YDL229W
YFR004W	YDL229W
YFR031C	YDL229W
YFR037C	YDL229W
YGL048C	YDL229W
YGL086W	YDL229W
YGR204W	YDL229W
YGR240C	YDL229W
YGR254W	YDL229W
YHL007C	YDL229W
YHL029C	YDL229W
YHR080C	YDL229W
YHR111W	YDL229W
YHR114W	YDL229W
YHR150W	YDL229W
YHR164C	YDL229W
YHR174W	YDL229W
YIL016W	YDL229W
YIL070C	YDL229W
YIR010W	YDL229W
YJL074C	YDL229W
YJL092W	YDL229W
YJL157C	YDL229W
YKL023W	YDL229W
YKL033W	YDL229W
YKR038C	YDL229W
YLL024C	YDL229W
YLR304C	YDL229W
YLR330W	YDL229W
YLR347C	YDL229W
YLR442C	YDL229W
YML036W	YDL229W
YML065W	YDL229W
YMR031C	YDL229W
YMR066W	YDL229W
YMR099C	YDL229W
YMR176W	YDL229W
YMR179W	YDL229W
YMR186W	YDL229W
YMR259C	YDL229W
YNL107W	YDL229W
YNL209W	YDL229W
YOL061W	YDL229W
YOL151W	YDL229W
YOR117W	YDL229W
YOR172W	YDL229W
YOR197W	YDL229W
YOR207C	YDL229W
YOR304W	YDL229W
YPL064C	YDL229W
YPL166W	YDL229W
YPL181W	YDL229W
YPL226W	YDL229W
YPL240C	YDL229W
YPR105C	YDL229W
YER018C	YDL233W
YJR112W	YDL233W
YOL069W	YDL233W
YDL236W	YDL236W
YFR004W	YDL236W
YJL106W	YDL236W
YJL164C	YDL236W
YJR059W	YDL236W
YNL154C	YDL236W
YPR148C	YDL237W
YBR160W	YDL239C
YBR221C	YDL239C
YDR201W	YDL239C
YIL144W	YDL239C
YMR117C	YDL239C
YOL069W	YDL239C
YPL240C	YDL239C
YDL246C	YDL246C
YMR308C	YDL246C
YPL031C	YDL246C
YPL240C	YDL246C
YBR160W	YDR001C
YDL229W	YDR001C
YFR004W	YDR001C
YFR014C	YDR001C
YJL164C	YDR001C
YJR059W	YDR001C
YPL240C	YDR001C
YLR394W	YDR004W
YDR005C	YDR005C
YER081W	YDR005C
YGR246C	YDR005C
YHR205W	YDR005C
YJR066W	YDR005C
YOR116C	YDR005C
YCR021C	YDR011W
YDL222C	YDR011W
YDR011W	YDR011W
YJR066W	YDR011W
YNL197C	YDR011W
YOR153W	YDR011W
YPR019W	YDR013W
YPR175W	YDR013W
YDR014W-A	YDR014W-A
YER095W	YDR014W-A
YDR016C	YDR016C
YDR201W	YDR016C
YIR010W	YDR016C
YKR037C	YDR016C
YDR020C	YDR020C
YJL165C	YDR020C
YNR012W	YDR020C
YPR141C	YDR020C
YBR160W	YDR027C
YER031C	YDR027C
YLR262C	YDR027C
YBL029C-A	YDR032C
YBR052C	YDR032C
YDL017W	YDR032C
YDL029W	YDR032C
YDL101C	YDR032C
YDL222C	YDR032C
YDR032C	YDR032C
YFR004W	YDR032C
YHR135C	YDR032C
YKL108W	YDR032C
YMR106C	YDR032C
YPL031C	YDR032C
YFR004W	YDR033W
YIR010W	YDR033W
YJR066W	YDR033W
YNL197C	YDR033W
YNR051C	YDR033W
YOR153W	YDR033W
YJR066W	YDR038C
YNL197C	YDR038C
YBR052C	YDR039C
YJR066W	YDR039C
YNL197C	YDR039C
YJR066W	YDR040C
YNL197C	YDR040C
YBR160W	YDR042C
YCR008W	YDR044W
YDR044W	YDR044W
YDR050C	YDR050C
YFR004W	YDR050C
YMR186W	YDR050C
YNR051C	YDR050C
YOR117W	YDR050C
YDR068W	YDR068W
YKL166C	YDR068W
YBL064C	YDR069C
YBR221C	YDR069C
YKL145W	YDR069C
YPR103W	YDR069C
YJL164C	YDR070C
YJR059W	YDR070C
YBR017C	YDR071C
YFR004W	YDR071C
YGR234W	YDR071C
YNR051C	YDR071C
YPL153C	YDR071C
YBR126C	YDR074W
YDR074W	YDR074W
YFL033C	YDR074W
YFR004W	YDR074W
YHR082C	YDR074W
YML100W	YDR074W
YMR261C	YDR074W
YNL154C	YDR074W
YDR091C	YDR091C
YFR004W	YDR091C
YHR082C	YDR091C
YHR135C	YDR091C
YOR117W	YDR091C
YBR160W	YDR093W
YJR066W	YDR093W
YAR007C	YDR097C
YBR160W	YDR097C
YDL229W	YDR097C
YFL013C	YDR097C
YPL055C	YDR097C
YER081W	YDR105C
YOR153W	YDR105C
YPL174C	YDR106W
YCR014C	YDR108W
YDR363W-A	YDR108W
YOR115C	YDR108W
YDR118W	YDR118W
YHR166C	YDR118W
YMR001C	YDR118W
YKL188C	YDR119W
YBL016W	YDR120C
YDR120C	YDR120C
YDR477W	YDR120C
YER125W	YDR120C
YHR079C	YDR120C
YJL164C	YDR120C
YML065W	YDR120C
YPL031C	YDR120C
YPL209C	YDR120C
YBR278W	YDR121W
YDR121W	YDR121W
YFL013C	YDR121W
YML065W	YDR121W
YPL082C	YDR121W
YJL187C	YDR122W
YKL048C	YDR122W
YML065W	YDR122W
YBR160W	YDR123C
YJR060W	YDR123C
YJL092W	YDR128W
YLR096W	YDR128W
YMR106C	YDR128W
YAR007C	YDR129C
YCR008W	YDR129C
YCR088W	YDR129C
YEL037C	YDR129C
YFR004W	YDR129C
YGL092W	YDR129C
YJL092W	YDR129C
YJR066W	YDR129C
YKL126W	YDR129C
YLR330W	YDR129C
YMR246W	YDR129C
YOL013C	YDR129C
YOR117W	YDR129C
YPL022W	YDR129C
YDL132W	YDR131C
YPL240C	YDR131C
YDR132C	YDR132C
YDR395W	YDR132C
YPL031C	YDR132C
YCR077C	YDR141C
YDR141C	YDR141C
YNL209W	YDR141C
YIL021W	YDR143C
YLR229C	YDR143C
YNL197C	YDR143C
YOL094C	YDR143C
YBR160W	YDR146C
YER018C	YDR146C
YFL009W	YDR146C
YFR028C	YDR146C
YPL031C	YDR146C
YPR046W	YDR146C
YDL239C	YDR148C
YDR148C	YDR148C
YDR388W	YDR148C
YFL018C	YDR148C
YIL125W	YDR148C
YML065W	YDR148C
YMR308C	YDR148C
YBL016W	YDR152W
YDR152W	YDR152W
YJL095W	YDR152W
YNL154C	YDR152W
YPL141C	YDR152W
YBL016W	YDR153C
YGL180W	YDR153C
YHR135C	YDR153C
YJL164C	YDR153C
YJR059W	YDR153C
YNL154C	YDR153C
YPR029C	YDR153C
YDL101C	YDR158W
YFR004W	YDR158W
YJL164C	YDR158W
YKL166C	YDR158W
YLR314C	YDR158W
YOR117W	YDR158W
YDL229W	YDR170C
YDR170C	YDR170C
YDR388W	YDR170C
YDR477W	YDR170C
YLR148W	YDR170C
YOR061W	YDR170C
YNL201C	YDR173C
YKL141W	YDR178W
YOR065W	YDR178W
YER147C	YDR180W
YDR328C	YDR184C
YKR083C	YDR184C
YLR433C	YDR184C
YNL154C	YDR184C
YNL197C	YDR184C
YOL069W	YDR184C
YAL017W	YDR190C
YAR007C	YDR190C
YBR231C	YDR190C
YCR093W	YDR190C
YDL029W	YDR190C
YEL044W	YDR190C
YER148W	YDR190C
YER164W	YDR190C
YFL013C	YDR190C
YFR004W	YDR190C
YFR013W	YDR190C
YGL150C	YDR190C
YGL167C	YDR190C
YGR040W	YDR190C
YGR163W	YDR190C
YHR135C	YDR190C
YIR010W	YDR190C
YLR052W	YDR190C
YML065W	YDR190C
YMR127C	YDR190C
YMR284W	YDR190C
YNL215W	YDR190C
YOR189W	YDR190C
YPL082C	YDR190C
YPL235W	YDR190C
YPL240C	YDR190C
YOL113W	YDR191W
YPL240C	YDR197W
YLR238W	YDR200C
YNL154C	YDR200C
YDL229W	YDR201W
YDR201W	YDR201W
YEL043W	YDR201W
YGR113W	YDR201W
YHR083W	YDR201W
YIR010W	YDR201W
YKL052C	YDR201W
YKL179C	YDR201W
YNL189W	YDR201W
YDR328C	YDR202C
YDL229W	YDR207C
YDR207C	YDR207C
YJL164C	YDR207C
YJR059W	YDR207C
YJR094C	YDR207C
YKL185W	YDR207C
YML099C	YDR207C
YNL330C	YDR207C
YOR351C	YDR207C
YAL054C	YDR216W
YAR018C	YDR216W
YBL016W	YDR216W
YBR017C	YDR216W
YBR198C	YDR216W
YDL029W	YDR216W
YDL042C	YDR216W
YDL214C	YDR216W
YGR052W	YDR216W
YHR099W	YDR216W
YMR106C	YDR216W
YPL240C	YDR216W
YDR218C	YDR218C
YPL161C	YDR218C
YAL026C	YDR238C
YDL055C	YDR238C
YDR170C	YDR238C
YFR004W	YDR238C
YGL051W	YDR238C
YIL076W	YDR238C
YIL106W	YDR238C
YNR051C	YDR238C
YOR197W	YDR238C
YBR059C	YDR239C
YBR160W	YDR239C
YFR028C	YDR239C
YGL180W	YDR239C
YGR040W	YDR239C
YHR135C	YDR239C
YJL164C	YDR239C
YLR096W	YDR239C
YDL078C	YDR244W
YDR244W	YDR244W
YGL153W	YDR244W
YGL205W	YDR244W
YGR133W	YDR244W
YJL210W	YDR244W
YKL197C	YDR244W
YLR191W	YDR244W
YMR026C	YDR244W
YBL049W	YDR255C
YMR135C	YDR255C
YNL197C	YDR255C
YDR118W	YDR260C
YDR260C	YDR260C
YHR166C	YDR260C
YIR025W	YDR260C
YML023C	YDR260C
YOR249C	YDR260C
YHR016C	YDR261C
YPL240C	YDR261C
YDL101C	YDR264C
YDR034W-B	YDR264C
YDR068W	YDR264C
YDR264C	YDR264C
YHR135C	YDR264C
YOL016C	YDR264C
YDR244W	YDR265W
YDR265W	YDR265W
YGL153W	YDR265W
YJL210W	YDR265W
YKL197C	YDR265W
YMR026C	YDR265W
YPL031C	YDR265W
YPL240C	YDR265W
YBL016W	YDR266C
YDR266C	YDR266C
YHR079C	YDR266C
YHR082C	YDR266C
YIR010W	YDR266C
YNL154C	YDR266C
YPL153C	YDR266C
YPR114W	YDR266C
YHR016C	YDR270W
YHR114W	YDR270W
YNL259C	YDR270W
YEL040W	YDR272W
YOR081C	YDR272W
YAL017W	YDR293C
YAL026C	YDR293C
YBR160W	YDR293C
YDL140C	YDR293C
YDR293C	YDR293C
YDR477W	YDR293C
YFR004W	YDR293C
YGL180W	YDR293C
YHL007C	YDR293C
YHR079C	YDR293C
YHR135C	YDR293C
YIR010W	YDR293C
YJL164C	YDR293C
YJL165C	YDR293C
YJR059W	YDR293C
YNL154C	YDR293C
YNL201C	YDR293C
YNR051C	YDR293C
YPL031C	YDR293C
YPL055C	YDR293C
YPL153C	YDR293C
YAR002C-A	YDR297W
YDR331W	YDR297W
YHR140W	YDR297W
YDL017W	YDR299W
YGR218W	YDR299W
YNL154C	YDR299W
YNL207W	YDR299W
YPL042C	YDR299W
YPL141C	YDR299W
YBR245C	YDR303C
YCR088W	YDR303C
YDR303C	YDR303C
YER148W	YDR303C
YGR275W	YDR303C
YIR010W	YDR303C
YLR033W	YDR303C
YML065W	YDR303C
YPL082C	YDR303C
YFL062W	YDR307W
YJL187C	YDR316W
YFR004W	YDR316W-B
YDR321W	YDR321W
YFR004W	YDR321W
YNR051C	YDR321W
YHR082C	YDR323C
YOR351C	YDR323C
YPL031C	YDR323C
YPL240C	YDR323C
YDR324C	YDR324C
YLR175W	YDR324C
YNR051C	YDR324C
YOL108C	YDR324C
YPL022W	YDR324C
YBR127C	YDR328C
YBR280C	YDR328C
YDL132W	YDR328C
YDR131C	YDR328C
YDR219C	YDR328C
YDR328C	YDR328C
YFL009W	YDR328C
YFR004W	YDR328C
YFR014C	YDR328C
YGR188C	YDR328C
YHR079C	YDR328C
YHR102W	YDR328C
YHR135C	YDR328C
YJL149W	YDR328C
YJL187C	YDR328C
YJR090C	YDR328C
YLR097C	YDR328C
YLR429W	YDR328C
YMR168C	YDR328C
YMR291W	YDR328C
YOL025W	YDR328C
YOR080W	YDR328C
YPL240C	YDR328C
YGL180W	YDR346C
YHR135C	YDR346C
YJL187C	YDR346C
YPL031C	YDR346C
YDR124W	YDR347W
YIL070C	YDR347W
YJR060W	YDR347W
YML065W	YDR347W
YDR129C	YDR353W
YDR353W	YDR353W
YFR004W	YDR353W
YHR106W	YDR353W
YOL128C	YDR353W
YBR059C	YDR354W
YFR014C	YDR354W
YPL031C	YDR354W
YEL005C	YDR357C
YEL013W	YDR359C
YGL158W	YDR359C
YDR361C	YDR361C
YPL031C	YDR361C
YPL125W	YDR361C
YBR272C	YDR363W-A
YDL020C	YDR363W-A
YEL037C	YDR363W-A
YGR232W	YDR363W-A
YKL145W	YDR363W-A
YMR173W	YDR363W-A
YOR257W	YDR363W-A
YPL031C	YDR363W-A
YER071C	YDR366C
YBL024W	YDR381W
YBR054W	YDR381W
YBR111W-A	YDR381W
YBR159W	YDR381W
YBR215W	YDR381W
YBR278W	YDR381W
YDL019C	YDR381W
YDL182W	YDR381W
YDR001C	YDR381W
YDR207C	YDR381W
YDR381W	YDR381W
YDR398W	YDR381W
YDR475C	YDR381W
YER110C	YDR381W
YER174C	YDR381W
YGL166W	YDR381W
YGR245C	YDR381W
YHR039C	YDR381W
YHR052W	YDR381W
YHR185C	YDR381W
YIL021W	YDR381W
YIL035C	YDR381W
YIL038C	YDR381W
YIL043C	YDR381W
YIL070C	YDR381W
YIL095W	YDR381W
YIR010W	YDR381W
YJL125C	YDR381W
YKL023W	YDR381W
YKR037C	YDR381W
YLR085C	YDR381W
YLR386W	YDR381W
YLR429W	YDR381W
YLR430W	YDR381W
YLR455W	YDR381W
YML012W	YDR381W
YML065W	YDR381W
YNL238W	YDR381W
YNR051C	YDR381W
YOL113W	YDR381W
[truncated: 6,459 more rows]
