# Supplementary material for: A Network-Based Approach on Elucidating the Multi-Faceted Nature of Chronological Aging in S. cerevisiae
Source: PLoS One. 2011 Dec 21;6(12):e29284. doi: 10.1371/journal.pone.0029284 (PMC3244448; doi:10.1371/journal.pone.0029284)
Supplement: Table S4 — Connected Component (CC) Analysis for the first 20 hubs of CAN, in CAN and BioGrid Network. (XLS) [file pone.0029284.s008.xls]

## Sheet: CC results
Table S4. Connected Components (CC) Analysis for the first 20 hubs of CAN, in CAN and BioGrid Network
	Present in the first 20 hubs in BioGrid Network?	Created CC # when deleted from CAN	Created CC # when deleted from tCAN	Created CC # when deleted from BioGrid Network	Fold change in CC # (CAN/BioGrid Network)	Fold change in CC # (tCAN/BioGrid Network)
YNL197C	YES	30	27	5	6	5.4
YDL229W	YES	8	9	2	4	4.5
YNR051C	YES	4	3	1	4	3
YHR135C	YES	7	3	2	3.5	1.5
YPL240C	YES	12	7	4	3	1.75
YNL154C	YES	5	2	2	2.5	1
YIR010W	YES	2	2	1	2	2
YBR160W	YES	10	8	5	2	1.6
YJR059W	YES	2	2	1	2	2
YPL031C	YES	7	6	4	1.75	1.5
YFR004W	YES	20	13	15	1.33333	0.87
YOR117W	YES	1	1	1	1	1
YJL164C	YES	3	3	4	0.75	0.75
YBL007C	NO	5	4	1	5	4
YNL189W	NO	3	2	1	3	2
YDR388W	NO	5	3	2	2.5	1.5
YAL005C	NO	2	2	1	2	2
YDR381W	NO	2	1	1	2	1
YML065W	NO	3	2	2	1.5	1
YHR082C	NO	3	2	3	1	0.67
