# Supplementary material for: A Network-Based Approach on Elucidating the Multi-Faceted Nature of Chronological Aging in S. cerevisiae
Source: PLoS One. 2011 Dec 21;6(12):e29284. doi: 10.1371/journal.pone.0029284 (PMC3244448; doi:10.1371/journal.pone.0029284)
Supplement: Table S6 — MCODE results of tCAN. (XLS) [file pone.0029284.s010.xls]

## Sheet: Table S6
Table S6. MCODE results of tCAN
Parameters:
Network Scoring:
Include Loops: true Degree Cutoff: 2
Cluster Finding:
Node Score Cutoff: 0.2 Haircut: true Fluff: false K-Core: 2 Max. Depth from Seed: 100
Cluster	Score (Density*#Nodes)	Nodes	Edges	NodeIDs
1	6.733	15	104	YFR050C	YGR135W	YGL011C	YGR253C	YOR362C	YBR173C	YJL001W	YOL038W	YML092C	YBL041W	YFL007W	YER094C	YFR004W	YMR314W	YPR103W
2	4.444	27	130	YGL070C	YBR272C	YDR394W	YDR363W-A	YGL048C	YOR259C	YGR232W	YOR117W	YKL145W	YDL007W	YEL037C	YGR186W	YDL140C	YJL140W	YKR001C	YFR037C	YBR245C	YBR089C-A	YIR010W	YOR210W	YDR404C	YIL021W	YDL115C	YGR005C	YER125W	YJL164C	YOR151C
3	4.2	10	49	YFR036W	YLR102C	YIR025W	YDR118W	YBL084C	YNL172W	YOR249C	YHR166C	YDR260C	YKL022C
4	3.111	9	36	YGL012W	YBR110W	YHR190W	YLR100W	YML008C	YMR015C	YLR056W	YHR007C	YGR060W
5	3	7	27	YGR113W	YKR083C	YDR016C	YGL061C	YKL052C	YDR201W	YKR037C
6	2.8	30	103	YLR085C	YDR244W	YGL153W	YOL147C	YMR026C	YLR191W	YDR265W	YPL240C	YDL165W	YLR385C	YNL107W	YMR223W	YGR252W	YPL047W	YBR111W-A	YHR099W	YBR198C	YER148W	YNL215W	YGL150C	YML065W	YGL133W	YOR304W	YLR052W	YFL013C	YOR189W	YFL039C	YML041C	YLR399C	YBR231C
7	2.212	66	182	YDL126C	YPL101W	YKL110C	YGR200C	YMR312W	YLR384C	YGL223C	YNL041C	YGL005C	YML071C	YPR105C	YGR120C	YAL034W-A	YJR112W	YGL043W	YBL075C	YHR140W	YOR165W	YBR106W	YMR215W	YKL065C	YMR058W	YBR159W	YAL005C	YGR103W	YPL178W	YGR134W	YDL160C	YGL014W	YNL288W	YNL091W	YOL013C	YML013W	YBR201W	YGR048W	YDR411C	YBR170C	YCR012W	YOL086C	YOR116C	YKL060C	YLR044C	YIL038C	YPR072W	YGL158W	YPL016W
8	1.667	6	12	YFR008W	YDR532C	YDR200C	YMR052W	YLR238W	YMR029C
9	1.524	21	43	YEL044W	YAR007C	YGL178W	YNR052C	YER068W	YCR093W	YDR190C	YJR109C	YHL011C	YLR314C	YCR002C	YJR076C	YHR107C	YER018C	YMR117C	YIL035C	YPR010C	YGR234W	YKL104C	YKL029C	YPL235W
10	1.5	6	10	YDR331W	YJR117W	YHL048W	YKL008C	YPL264C	YIL016W
11	1.5	14	27	YIR037W	YPL058C	YOR153W	YLR084C	YOR301W	YGR041W	YLR353W	YLR274W	YPR019W	YCL061C	YMR048W	YBL023C	YJL030W	YGR254W
12	1.5	4	7	YDR255C	YBL049W	YMR135C	YIL017C
13	1.5	4	6	YHL029C	YNL032W	YCR095C	YNL099C
14	1.5	4	6	YOL062C	YJR005W	YBL037W	YJR058C
15	1.455	33	76	YMR186W	YMR075W	YNL209W	YPL231W	YPL106C	YLR153C	YKL152C	YML028W	YGR192C	YGL181W	YHR016C	YOR284W	YPL246C	YDR264C	YGL203C	YER166W	YOR104W	YMR010W	YDR068W	YDL042C	YML109W	YNL197C	YKL054C	YER103W	YGL206C	YNL313C	YDR303C	YBR126C	YML100W	YDR074W	YMR261C	YDL017W	YDR050C
16	1.333	6	14	YNL333W	YGR040W	YDL159W	YMR322C	YMR096W	YFL059W
17	1.2	40	73	YDR207C	YDL076C	YPL082C	YDR496C	YOR061W	YOR119C	YBR059C	YIL095W	YGL051W	YDL029W	YLR429W	YPL022W	YOL090W	YCR092C	YDR097C	YOR326W	YMR109W	YBR202W	YBL105C	YGR229C	YAL026C	YBR023C	YLR330W	YMR294W	YIL144W	YDL239C	YGR268C	YBL034C	YBL097W	YLR086W	YDR325W	YLR272C	YJL074C	YDL055C	YPL226W	YPL061W	YER095W	YDL074C	YPL174C	YKL185W
18	1.174	23	44	YPR036W	YDL185W	YDR381W	YER174C	YER110C	YOR185C	YLR293C	YEL043W	YGR089W	YPR141C	YOL069W	YEL061C	YAL047C	YER052C	YEL056W	YHR183W	YKL195W	YBR091C	YEL020W-A	YHR005C-A	YAL059W	YOR048C	YDR475C
19	1.154	13	20	YDR388W	YNL330C	YPL181W	YHR052W	YNL175C	YMR036C	YDR347W	YJR101W	YIL070C	YPL150W	YMR001C	YFR028C	YLR096W
20	1.143	7	13	YPR054W	YPR191W	YBL045C	YHR030C	YHL007C	YIL106W	YFL010C
21	1.107	28	46	YER165W	YDL209C	YPL151C	YPL190C	YPL031C	YHR111W	YDR032C	YLR413W	YML072C	YDR120C	YNL186W	YOL082W	YBL078C	YLR262C	YLR304C	YMR246W	YDR398W	YDR324C	YNR016C	YKL157W	YKL166C	YOR162C	YMR155W	YDR414C	YJL004C	YKR002W	YNL261W	YER049W
22	1.091	11	19	YBL007C	YNL154C	YMR190C	YPL141C	YER133W	YHR158C	YIR006C	YKL035W	YER070W	YGR180C	YHR079C
23	1	4	6	YGR240C	YGL207W	YJL187C	YMR205C
24	1	3	5	YAR002C-A	YML012W	YMR272C
25	1	25	39	YKL171W	YLR248W	YBR112C	YKL038W	YLR362W	YOL016C	YPR013C	YJL165C	YPR160W	YIL074C	YER081W	YNL151C	YER164W	YOR207C	YDR005C	YGR163W	YML121W	YBR127C	YGR155W	YLR442C	YMR307W	YNL021W	YDR520C	YKR034W	YJR066W
26	1	4	5	YNL052W	YDL067C	YML042W	YGL187C
27	1	3	3	YEL019C	YML023C	YDL105W
28	1	4	8	YLR148W	YDR170C	YGL124C	YMR231W
29	1	3	6	YOR211C	YDR470C	YBR179C
30	1	5	9	YNR051C	YCL028W	YDL084W	YHR039C	YGL008C
31	1	4	5	YOL108C	YPR029C	YKL135C	YDR123C
32	1	3	4	YBR215W	YOR038C	YBL008W
33	1	5	8	YBR041W	YMR152W	YPL180W	YEL013W	YJL151C
34	1	3	3	YKL148C	YLL041C	YBR044C
35	1	3	4	YBR160W	YJL095W	YJR092W
36	1	9	14	YPR115W	YGL180W	YCL029C	YNL304W	YML031W	YJR059W	YER010C	YGL221C	YJL106W
37	0.875	8	10	YHR135C	YDL099W	YER043C	YJR090C	YHR114W	YLR324W	YDR270W	YNL259C
38	0.857	7	12	YHR082C	YDL013W	YBL030C	YJR048W	YKR066C	YOR373W	YPL055C
39	0.75	4	7	YOR081C	YJR104C	YJL034W	YNR050C
40	0.667	3	4	YGR281W	YDL222C	YBR052C
41	0.667	3	5	YDR091C	YDR121W	YLR432W
42	0.667	3	4	YGR152C	YDR218C	YPL161C
43	0.667	3	5	YHR104W	YMR300C	YML086C
44	0.667	3	5	YDR361C	YJR056C	YMR021C
45	0.667	3	5	YDL167C	YBR212W	YBL081W
46	0.667	3	5	YNL265C	YKL002W	YKR035W-A
47	0.667	3	5	YDL153C	YAL019W	YJR119C
48	0.5	2	3	YHR026W	YAR028W
49	0.5	2	3	YGR010W	YLR328W
50	0.5	2	3	YKL196C	YAR027W
51	0.5	2	3	YOL061W	YGR173W
52	0.5	2	3	YGR204W	YKL210W
53	0.5	2	3	YFL033C	YPL204W
54	0.5	2	3	YOR193W	YPL112C
55	0.5	2	3	YCR005C	YOR323C
56	0.5	2	3	YOR108W	YNL104C
57	0.5	2	3	YNR012W	YDR020C
58	0.5	2	3	YKL048C	YKL142W
[truncated: 20 more columns]
