# Supplementary material for: A Network-Based Approach on Elucidating the Multi-Faceted Nature of Chronological Aging in S. cerevisiae
Source: PLoS One. 2011 Dec 21;6(12):e29284. doi: 10.1371/journal.pone.0029284 (PMC3244448; doi:10.1371/journal.pone.0029284)
Supplement: Table S7 — MCODE results of BioGrid Network. (XLS) [file pone.0029284.s011.xls]

## Sheet: Table S7
Table S7. MCODE results of BioGrid Network
Parameters:
Network Scoring:
Include Loops: true Degree Cutoff: 2
Cluster Finding:
Node Score Cutoff: 0.2 Haircut: true Fluff: false K-Core: 2 Max. Depth from Seed: 100
Cluster	Score (Density*#Nodes)	Nodes	Edges	Node IDs
1	25.603	58	1490	YOR096W	YDR471W	YLR441C	YLL045C	YBL027W	YLR448W	YML063W	YLR029C	YGR085C	YHL001W	YDL075W	YGL147C	YNL178W	YHR203C	YMR194W	YNL069C	YPL090C	YER151C	YPL220W	YOR063W	YDL083C	YDL082W	YGL030W	YBR031W	YJL177W	YGL135W	YOR312C	YMR242C	YPL249C-A	YKL180W	YDR418W	YBR048W	YCR031C	YIL018W	YLR075W	YHL033C	YER074W	YJL190C	YOL127W	YDL136W	YBL072C	YNR051C	YDR382W	YNL301C	YMR142C	YGR034W
2	11.68	125	1498	YGL111W	YDR130C	YMR112C	YNR010W	b2592	YLR186W	YDR025W	YHR066W	YLL034C	YOR272W	YKL172W	YDR347W	YPL013C	YGR084C	YHL004W	YDR337W	YMR188C	YJR101W	YBR251W	YPL118W	YBR146W	YOR158W	YGR165W	YGL129C	YJR113C	YMR158W	YNL306W	YNL137C	YKL155C	YBL090W	YIL093C	YDR041W	YDR175C	YML065W	YMR093W	YLR222C	YCL059C	YDR363W-A	YOR259C	YLR421C	YLL039C	YGL151W	YPR168W	YBR253W	YGL025C	YDL005C
3	7.143	98	730	YLR449W	YBR272C	YGL004C	YGL246C	YGR145W	YKR060W	YGL123W	YLR009W	YDR496C	YOR267C	YOR206W	YKL021C	YLR276C	YNL110C	YDR412W	YPL131W	YNL124W	YLR312W-A	YDR237W	YBR122C	YBL038W	YMR193W	YLR439W	YDR116C	YKL167C	YDR296W	YCR046C	YJL063C	YMR024W	YML025C	YNL252C	YOL027C	YGR215W	YIL070C	YER050C	YPR125W	YKR085C	YKR006C	YDR322W	YDR473C	YGR074W	YBL026W	YOR308C	YDR378C	YJR022W	YBR055C
4	6.656	96	675	YDR462W	YNL284C	YOR150W	YLR033W	YDR299W	YGL158W	YOL005C	YDR404C	YIL021W	YJL140W	YCL054W	YDR091C	YKL009W	YKL173W	YER146W	YDR482C	YDL209C	YMR213W	YER029C	YBR119W	YDR240C	YDR235W	YHR086W	YDL087C	YLL036C	YDL160C	YOR204W	YDL060W	YJL069C	YOR145C	YPL012W	YOL041C	YBR142W	YKL014C	YHR010W	YGR245C	YDR101C	YOL120C	YNR054C	YDL014W	YER164W	YMR227C	YPL011C	YMR005W	YCR042C	YML015C
5	5.091	132	724	YNL175C	YGR278W	YDR364C	YKL095W	YCR063W	YNL182C	YLR106C	YGR135W	YJL001W	YGL011C	YJL148W	YNL308C	YLR367W	YAL035W	YLR175W	YDR118W	YHR166C	YDL008W	YKL022C	YGL240W	YLR102C	YIR025W	YBL084C	YDR113C	YLR127C	YOR249C	YDR260C	YNL172W	YDR156W	YHR069C	YNR024W	YNL112W	YHR081W	YGR158C	YCR035C	YNL317W	YGR156W	YKL018W	YLR277C	YDR301W	YLR115W	YJR093C	YKL059C	YAL043C	YPR107C	YNL222W
6	3.2	60	227	YGL077C	YML072C	YIL121W	YOR153W	YHR096C	YPR156C	YHR140W	YPL076W	YJL117W	YGR060W	YML008C	YGL012W	YNL280C	YER044C	YMR215W	YJL196C	YDL015C	YDL232W	YOR085W	YML019W	YER087C-B	YGL022W	YJL002C	YLR208W	YLR378C	YBR110W	YHR094C	YDL222C	YDR032C	YDL029W	YIL062C	YJR065C	YKL013C	YNR035C	YLR370C	YOR361C	YER145C	YDR011W	YML024W	YKL052C	YGR113W	YKR037C	YKL138C-A	YGL061C	YKR083C	YDR201W
7	2.691	55	171	YBR188C	YKR022C	YJL164C	YEL015W	YOL149W	YNL145W	YNL118C	YDR472W	YML077W	YEL048C	YOR115C	YGR166W	YBR254C	YKR068C	YDR407C	YMR218C	YDR246W	YER105C	YKL057C	YGL100W	YJR042W	YHR170W	YGL099W	YBR084W	YNL207W	YPR143W	YOR056C	YMR229C	YLR196W	YDR174W	YAR007C	YBR089C-A	YPR052C	YBR010W	YJL168C	YHR143W-A	YPR110C	YOR332W	YMR054W	YHR039C-A	YGR020C	YPR036W	YEL051W	YKL080W	YLR447C	YDR224C
8	2.5	14	36	YHR141C	YGL031C	YLR287C-A	YOL040C	YFR004W	YLR340W	YDR012W	YPL198W	YER102W	YIL069C	YJR145C	YGL122C	YBL092W	YBR191W
9	2.38	50	138	YBR088C	YBR087W	YOL094C	YFR027W	YER173W	YNL290W	YMR078C	YML105C	YDL051W	YPR088C	YKL122C	YPL210C	YDL092W	YBR283C	YKL065C	YGL200C	YER122C	YFL048C	YKL154W	YMR058W	YCR034W	YHR123W	YAR002C-A	YMR272C	YLR350W	YOR165W	YLR372W	YER118C	YLR292C	YAL028W	YOR324C	YLR113W	YDR168W	YDL108W	YLR005W	YNL101W	YHL042W	YDR307W	YHR142W	YOR316C	YBR207W	YPL243W	YNR052C	YDR252W	YGR134W	YHR193C
10	2.333	6	19	YNR017W	YLR008C	YJL104W	YNL131W	YGR033C	YJL143W
11	2.294	85	239	YDR099W	YKL008C	YDR331W	YBR106W	YIL027C	YPL221W	YER020W	YGR055W	YPL058C	YPL231W	YLR044C	YLL026W	YPL048W	YBR118W	YIL115C	YGL092W	YKR082W	YMR047C	YJL061W	YBR169C	YPL204W	YPL037C	YAL021C	YDL165W	YMR012W	YCR084C	YNL329C	YNL214W	YDR244W	YGL153W	YKL197C	YOL044W	YLR191W	YNL025C	YDR283C	YFR009W	YDR214W	YGR240C	YDL213C	YDR228C	YLR432W	YDL084W	YML062C	YNL088W	YDR238C	YPL010W
12	2.29	93	274	YOR027W	YHR062C	YNL282W	YBR257W	YGR030C	YAL033W	YBL018C	YNL221C	YBR167C	YNL246W	YPL141C	YHR190W	YGL001C	YHR072W	YLR100W	YLR056W	YML012W	YDR297W	YPL264C	YMR026C	YDR265W	YKL068W	YDL116W	YGR119C	YBR289W	YOR270C	YLR381W	YGR179C	YJR135C	YDR254W	YPL018W	YHR107C	YIL144W	YDL185W	YBR127C	YER036C	YNL064C	YDR489W	YML069W	YNL107W	YGR002C	YPL235W	YBL074C	YDL208W	YGL078C	YHR089C
13	2	20	56	YDR172W	YDR188W	YDR507C	YJR076C	YNL166C	YCL024W	YCR002C	YPL153C	YLR347C	YJL041W	YPL106C	YPR162C	YLL004W	YNL261W	YLR314C	YDR385W	YMR146C	YNL244C	YLR291C	YNL251C
14	2	5	12	YMR312W	YHR187W	YPL086C	YPL101W	YGR200C
15	2	5	10	YIL071C	YDR179C	YMR025W	YDL216C	YOL117W
16	2	5	15	YKL041W	YPR173C	YLR025W	YKL002W	YKR035W-A
17	2	5	12	YOR297C	YDL217C	YJL054W	YHR005C-A	YBR091C
18	1.947	19	47	YHR090C	YNL136W	YOR244W	YDR359C	YBR279W	YGL244W	YOR061W	YLR418C	YMR061W	YDL140C	YOL145C	YGL019W	YLR399C	YER092W	YOR304W	YBR245C	YDL002C	YFL013C	YEL034W
19	1.75	8	20	YFL060C	YDR533C	YDL159W	YMR322C	YMR096W	YFL059W	YNL334C	YNL333W
20	1.717	60	125	YDL225W	YCL039W	YDR255C	YMR135C	YIL097W	YIL017C	YBL049W	YIL142W	YDL143W	YJL111W	YGL116W	YGL003C	YFL037W	YML085C	YJL039C	YLL024C	YOR197W	YER103W	YLR293C	YOR185C	YMR235C	YOR250C	YBL075C	YPR135W	YCL061C	YJL072C	YBL023C	YBR060C	YHR118C	YBR126C	YCL040W	YMR237W	YKR027W	YJL099W	YOR299W	YLR330W	YPL110C	YJL076W	YDR110W	YKR010C	YOR133W	YKL029C	YBL039C	YDR127W	YOR375C	YOL013C
21	1.714	7	15	YOR020C	YBR123C	YPL007C	YGL180W	YDR362C	YAL001C	YOR110W
22	1.676	71	157	YGR159C	YBR036C	YBR183W	YBR290W	YLR018C	YNL139C	YDR159W	YPL190C	YGL049C	YGL173C	YML056C	YDR502C	YGR083C	YDR211W	YOR260W	YKR026C	YKL211C	YDL145C	YNL287W	YLL022C	YPL226W	YDR001C	YER177W	YMR202W	YGR175C	YMR015C	YPR113W	YPL233W	YGL093W	YER018C	YMR117C	YGR281W	YCR021C	YOR273C	YCR030C	YGR130C	YDR497C	YBR052C	YPR138C	YDR501W	YML016C	YKR024C	YGL207W	YDL229W	YPL045W	YDR080W
23	1.667	6	13	YBR065C	YOR039W	YMR309C	YPL081W	YBR079C	YDR429C
24	1.6	15	31	YDR005C	YGL008C	YOR284W	YIL112W	YCR033W	YOL068C	YGL194C	YKR029C	YDR155C	YNL094W	YGL181W	YNL243W	YNL007C	YNL229C	YJR066W
25	1.5	4	8	YPR041W	YPL237W	YJR007W	YER025W
26	1.5	4	6	YNL258C	YGL145W	YGL098W	YDR498C
27	1.476	21	40	YLL043W	YER070W	YML058W	YJR140C	YJL167W	YBL017C	YJL154C	YNL314W	YGR203W	YBR112C	YNL167C	YKL171W	YDR490C	YFR017C	YPL056C	YKL166C	YJR001W	YMR140W	YGL059W	YLR195C	YJR059W
28	1.462	39	72	YKL140W	YBR177C	YBR041W	YDL052C	YJR009C	YNL262W	YLR026C	YJR075W	YPL050C	YDR245W	YGL167C	YER162C	YIL063C	YNL084C	YOR181W	YBR108W	YPL085W	YDL195W	YPR181C	YDR192C	YER081W	YDL207W	YLR268W	YOR075W	YBL050W	YMR183C	YHR161C	YOR327C	YDL100C	YHR098C	YBR130C	YGR080W	YKR039W	YGL051W	YNL263C	YGL198W	YOR132W	YPR028W	YBR002C
29	1.4	10	18	YPL160W	YPL111W	YOR104W	YHR108W	YLR170C	YGL206C	YJR125C	YBR023C	YGL203C	YER166W
30	1.378	45	80	YJR092W	YMR032W	YDR379W	YLR229C	YIL034C	YKL007W	YDR468C	YGR142W	YJL053W	YMR010W	YOR233W	YKL082C	YDR309C	YMR273C	YHR061C	YBL008W	YOR038C	YEL056W	YDR233C	YDR480W	YDR122W	YER167W	YHR158C	YAR014C	YNL044W	YOR089C	YAL002W	YDR495C	YGR078C	YJL179W	YNL153C	YML094W	YEL003W	YLR200W	YDL131W	YHR079C	YDL006W	YML100W	YMR261C	YNL250W	YJL138C	YAL036C	YAL005C	YIL053W	YIL095W
31	1.348	23	41	YLR450W	YGR048W	YBR170C	YIL030C	YMR264W	YJR058C	YJR005W	YOL062C	YPL259C	YER165W	YOL018C	YDR264C	YBR241C	YDL192W	YBR068C	YJL192C	YEL027W	YPL234C	YCL025C	YDL212W	YPL274W	YOR016C	YEL002C
32	1.286	56	98	YGL234W	YLR258W	YJL137C	YFR015C	YFR014C	YNL227C	YBR267W	YIL074C	YAR042W	YGL055W	YJR118C	YGL105W	YBR128C	YLR240W	YLR360W	YBR097W	YPL120W	YLR259C	YJL014W	YJR064W	YGL190C	YJL194W	YPR119W	YLR131C	YPL256C	YCL014W	YDR212W	YNL212W	YDR141C	YGR152C	YFL022C	YMR284W	YIL149C	YNL225C	YOL091W	YDL139C	YPL124W	YFR031C	YBL097W	YDR325W	YMR001C	YMR055C	YJR053W	YDL003W	YGR184C	YML051W
33	1.273	11	18	YIL125W	YOR065W	YJL062W-A	YNL052W	YGR112W	YBL045C	YER179W	YJL026W	YML064C	YDR148C	YFR049W
34	1.231	52	92	YOR036W	YBL102W	YPL246C	YNL130C	YBR159W	YLL050C	YGL195W	YBR017C	YBL003C	YOR217W	YLR048W	YPR035W	YDR171W	YBL016W	YDR103W	YBR200W	YPL232W	YGR009C	YDR164C	YNR049C	YGL178W	YCR093W	YNL288W	YKL054C	YGL106W	YLR203C	YIL157C	YML129C	YOR007C	YBR105C	YGR054W	YDR432W	YDR121W	YBL052C	YKL049C	YKR092C	YHR135C	YGR231C	YJL183W	YGR132C	YOR119C	YOR054C	YHR007C	YPR019W	YDR083W	YPL116W
35	1.216	37	63	YBL032W	YIL130W	YLR116W	YOR198C	YPL209C	YIL091C	YGL179C	YML042W	YDR120C	YHR115C	YNL311C	YNL289W	YHR042W	YKL025C	YDR293C	YBR086C	YGR241C	YBL047C	YOR081C	YDL155W	YCL029C	YGR058W	YPR141C	YNR038W	YJR041C	YPL193W	YHR034C	YPR042C	YOR329C	YNL298W	YDL149W	YJL090C	YDR217C	YBR274W	YMR270C	YBL025W	YLR265C
36	1.212	33	59	YNL126W	YML035C	YOL100W	YPL112C	YPR154W	YBR101C	YKR059W	YLR179C	YAL047C	YEL066W	YMR180C	YOL123W	YGR218W	YEL043W	YKL142W	YPL004C	YCL043C	YIR037W	YLR345W	YLR257W	YKL116C	YMR052W	YLR238W	YDR200C	YNL154C	YOR177C	YER129W	YKL042W	YPL255W	YGL075C	YDL239C	YKR034W	YHR172W
37	1.2	25	43	YER019C-A	YLR377C	YKR007W	YEL013W	YJR068W	YOL126C	YML067C	YLR342W	YJR077C	YLR337C	YAL026C	YDR054C	YDL132W	YDR277C	YJR090C	YHR114W	YBR069C	YML048W	YEL017C-A	YGR284C	YGR105W	YHR026W	YIR038C	YML055W	YDR074W
38	1.2	10	17	YNL135C	YNL023C	YOR335C	YJL106W	YNL006W	YER065C	YHR186C	YGL229C	YJL178C	YHR175W
39	1.167	6	8	YGL079W	YDR357C	YPR175W	YHR121W	YLR408C	YEL005C
40	1.143	42	68	YGR029W	YKL195W	YHR012W	YOR069W	YDR100W	YPR079W	YJR110W	YDR425W	YNL197C	YLR452C	YLR417W	YPL065W	YLR119W	YJR102C	YCR089W	YNR044W	YNL016W	YIL079C	YJL050W	YMR304W	YPR115W	YOL001W	YFL033C	YNL157W	YDL053C	YGR178C	YIL106W	YPR191W	YNL177C	YDR300C	YLR403W	YPL180W	YLR454W	YEL061C	YBR034C	YJL025W	YML043C	YDR150W	YGR089W	YLL001W	YEL020W-A	YEL039C
41	1.111	9	16	YBR273C	YCR083W	YHR106W	YDR470C	YOR211C	YBR179C	YLR368W	YJL048C	YDL126C
42	1.1	10	17	YAL059W	YDR138W	YKL214C	YOR373W	YDL088C	YMR153W	YDR335W	YML103C	YOR098C	YMR308C
43	1.1	10	17	YPL031C	YER059W	YKL103C	YGL215W	YGL119W	YOR083W	YDL179W	YNR064C	YFL028C	YJL218W
44	1.087	23	38	YOR155C	YML099C	YMR042W	YMR043W	YCL066W	YFL026W	YLR359W	YGR037C	YDL117W	YJR138W	YER114C	YMR164C	YER109C	YBR083W	YPL049C	YBR176W	YDL125C	YHL018W	YPR193C	YBR111C	YLR245C	YPL070W	YHR068W
45	1	5	7	YPR056W	YGL044C	YPR086W	YDR311W	YDR460W
46	1	6	10	YJL098W	YGR262C	YBL030C	YPL063W	YIL022W	YNL055C
47	1	3	4	YKL213C	YKL020C	YFL044C
48	1	9	12	YBR109C	YKL129C	YIR006C	YBL007C	YBR136W	YDR097C	YOL090W	YCR092C	YKL067W
49	1	5	8	YBR195C	YNL183C	YKL089W	YPR018W	YML102W
50	1	6	10	YHR164C	YLR109W	YLR032W	YCR066W	YNL312W	YDR499W
51	1	24	35	YMR250W	YHR206W	YLR006C	YCR073C	YDL056W	YJL165C	YJR083C	YGL115W	YPR160W	YLR303W	YCR105W	YGR092W	YEL046C	YJL141C	YDR079C-A	YPL122C	YER161C	YBR085W	YER171W	YDR343C	YJR017C	YNL014W	YNL098C	YAL024C
52	1	5	7	YAR033W	YGL104C	YML075C	YIL016W	YPR198W
53	1	3	5	YLL049W	YHR129C	YDR106W
54	1	6	7	YER110C	YCL009C	YMR108W	YOL034W	YEL019C	YDR288W
55	1	4	7	YGR173W	YOL061W	YBL068W	YER099C
56	1	4	4	YER031C	YJL204C	YAL030W	YDR027C
57	1	4	6	YCR007C	YDL120W	YKL148C	YLL041C
58	1	3	4	YKL135C	YPR029C	YJL207C
59	1	3	3	YNL119W	YGL211W	YOR251C
60	1	9	13	YFL016C	YDL112W	YJR045C	YMR039C	YNL259C	YDR270W	YPL002C	YMR077C	-
61	1	3	3	YJR052W	YBR114W	YMR201C
62	1	7	12	YDR253C	YJR060W	YNL272C	YGR040W	YGL245W	YAR019C	YNL103W
63	1	3	3	YOR301W	YLR353W	YGR041W
64	1	3	3	YAL010C	YHR083W	YMR060C
65	1	4	6	YHR157W	YMR133W	YLR329W	YHL022C
66	1	4	6	YGR014W	YJL013C	YMR131C	YJL030W
67	1	4	4	YOL096C	YDR204W	YLR201C	YGR255C
68	0.917	12	17	YDL101C	YEL017W	YGL256W	YDL220C	YDR356W	YMR129W	YJL074C	YLR086W	YLR163C	YIL066C	YER149C	YLL021W
69	0.909	11	20	YFR028C	YCR086W	YML109W	YNL271C	YLR319C	YDL089W	YNL218W	YJL128C	YNR031C	YIL147C	YOR265W
70	0.9	10	16	YBR288C	YGR261C	YDR353W	YGR209C	YLL060C	YGR140W	YPL008W	YJR046W	YLR274W	YLR429W
71	0.857	7	11	YLR082C	YDR479C	YNL111C	YMR203W	YNL121C	YBR298C	YDR284C
72	0.833	6	11	YGL058W	YPL269W	YPL155C	YFL008W	YDL074C	YPL055C
73	0.8	5	7	YDR218C	YIL047C	YOR212W	YAL041W	YPL161C
74	0.8	5	6	YMR165C	YLR362W	YOL016C	YJL110C	YDL214C
75	0.75	4	5	YFR034C	YGL097W	YBL002W	YGL150C
76	0.75	4	6	YKR097W	YIL033C	YDR247W	YDL042C
77	0.75	4	7	YHL007C	YER063W	YDL153C	YJR119C
78	0.75	4	7	YLL023C	YBR054W	YOR254C	YDR414C
79	0.75	4	5	YBR233W	YKL074C	YJR021C	YNL210W
80	0.75	4	6	YJL034W	YMR307W	YPR124W	YKL203C
81	0.75	4	5	YCR079W	YGR193C	YPL022W	YOR368W
82	0.75	4	5	YLR423C	YMR059W	YLR438W	YLR328W
83	0.667	3	4	YHR023W	YGR254W	YHR013C
84	0.667	3	4	YMR080C	YMR083W	YBR072W
85	0.667	3	4	YPR165W	YPL028W	YLR324W
86	0.667	3	4	YMR105C	YNL138W	YDR306C
87	0.667	3	5	YMR168C	YDL064W	YER016W
88	0.667	3	4	YDR256C	YER086W	YBR261C
89	0.667	3	5	YNL277W	YBR059C	YGL213C
90	0.667	3	4	YGR188C	YGL086W	YFL047W
91	0.667	3	4	YFL003C	YBR133C	YDL154W
92	0.667	3	4	YDL058W	YDL099W	YDR517W
93	0.667	3	5	YBR037C	YLL009C	YBR024W
94	0.667	3	4	YDR322C-A	YLR295C	YPL078C
95	0.667	3	5	YDL013W	YMR111C	YDR397C
96	0.667	3	5	YHR082C	YOR162C	YBL064C
97	0.5	2	3	YPL178W	YGR162W
98	0.5	2	3	YLR145W	YDR478W
99	0.5	2	3	YNL265C	YLR181C
100	0.5	2	3	YDR057W	YML029W
101	0.5	2	3	YDL130W	YOL039W
102	0.5	2	3	YLR022C	YDR381W
103	0.5	2	3	YIL046W	YJL058C
104	0.5	2	3	YGL253W	YKL038W
105	0.5	2	3	YER040W	YMR139W
106	0.5	2	3	YPR020W	YML081C-A
107	0.5	2	3	YBR077C	YGR163W
108	0.5	2	3	YGL238W	YDR170C
109	0.5	2	3	YNR016C	YJL020C
110	0.5	2	3	YPL174C	YMR294W
111	0.5	2	3	YLR248W	YDL047W
112	0.5	2	3	YBL081W	YDL167C
113	0.5	2	3	YBR061C	YPL183C
114	0.5	2	3	YDR310C	YDR328C
115	0.5	2	3	YGR024C	YHR112C
116	0.5	2	3	YDR361C	YJR056C
117	0.5	2	3	YFL050C	YOL130W
118	0.5	2	3	YJL113W	YJL114W
119	0.5	2	3	YER049W	YPL089C
120	0.5	2	3	YOR101W	YLR310C
121	0.5	2	3	YPL135W	YBR057C
122	0.5	2	3	YOL083W	YMR289W
123	0.5	2	3	YMR120C	YJL153C
124	0.5	2	3	YCR005C	YOR323C
125	0.5	2	3	YOR111W	YMR021C
[truncated: 86 more columns]
