# Supplementary material for: A Network-Based Approach on Elucidating the Multi-Faceted Nature of Chronological Aging in S. cerevisiae
Source: PLoS One. 2011 Dec 21;6(12):e29284. doi: 10.1371/journal.pone.0029284 (PMC3244448; doi:10.1371/journal.pone.0029284)
Supplement: Table S9 — BINGO results for clusters of CAN. (XLS) [file pone.0029284.s013.xls]

## Sheet: Table S9
Table S9. BINGO results for clusters of CAN
Cluster #	Enriched GO Process Term	Corrected P-value	MCODE Score
1	ubiquitin-dependent protein catabolic process	1.6251e-22	7.706
	modification-dependent protein catabolic process	1.6251e-22
2	anaphase-promoting complex-dependent proteasomal ubiquitin-dependent protein catabolic process	2.1235e-17	4.667
	ergosterol biosynthetic process	9.6887e-07
	steroid biosynthetic process	6.4412e-06
	farnesyl diphosphate biosynthetic process, mevalonate pathway	0.028474
3	regulation of microtubule polymerization or depolymerization	1.1955e-09	3.587
	cell cycle	2.0098e-09
	chromosome organization and biogenesis	0.00030194
	cytokinesis, site selection	0.001055
4	DNA strand elongation during DNA replication	4.8212e-13	3.2
	response to DNA damage stimulus	1.3319e-10
	DNA repair	1.761e-09
	nucleobase, nucleoside, nucleotide and nucleic acid metabolic process	3.1709e-05
5	establishment and/or maintenance of chromatin architecture	3.9546e-10	2.466
	M phase of mitotic cell cycle	3.6264e-08
	intra-Golgi vesicle-mediated transport	3.6264e-08
	protein import into peroxisome matrix	7.0742e-06
	peroxisome organization and biogenesis	4.015e-05
	retrograde transport, vesicle recycling within Golgi	4.0721e-05
7	cell wall chitin metabolic process	1.6205e-10	2.444
	glucosamine metabolic process	1.5609e-09
	pyruvate metabolic process	0.0005982
	glucose catabolic process to ethanol	0.0011577
	amino acid catabolic process to alcohol via Ehrlich pathway	0.0024187
	ethanol metabolic process	0.0024187
	glycolysis	0.014186
	cytokinesis	0.014186
8	tRNA modification	2.1314e-07	2.179
	ribosome biogenesis	0.0017073
	chronological cell aging	0.0092619
	regulation of nucleobase, nucleoside, nucleotide and nucleic acid metabolic process	0.0017134
11	actin cytoskeleton organization and biogenesis	2.8624e-09	1.703
	endocytosis	0.00046984
	membrane invagination	0.00081224
	phosphate metabolic process	0.0044441
	vacuolar acidification	0.0076907
	intracellular pH reduction	0.0076907
	regulation of intracellular pH	0.0079102
12	S phase of mitotic cell cycle	6.1267e-09	1.6
	DNA replication initiation	7.1483e-08
	interphase of mitotic cell cycle	9.9405e-06
	cell cycle phase	1.595e-05
13	negative regulation of gluconeogenesis	1.0024e-06	1.5
	proteasomal ubiquitin-dependent protein catabolic process	0.00010816
14	vesicle-mediated transport	1.2724e-08	1.5
	establishment of localization in cell	4.8332e-07
	late endosome to vacuole transport via multivesicular body sorting pathway	5.2638e-06
	protein retention in Golgi apparatus	0.00041189
15	vitamin B6 biosynthetic process	5.5654e-07	1.4
	pyridoxine biosynthetic process	5.5654e-07
	thiamin and derivative biosynthetic process	0.00054833
	aldehyde metabolic process	0.002468
16	trehalose biosynthetic process	1.0666e-06	1.375
	carbohydrate biosynthetic process	2.4587e-05
	establishment and/or maintenance of cell polarity	8.0643e-05
	GMP biosynthetic process	0.0015239
	response to stress	0.0015239
	gluconeogenesis	0.017982
	purine ribonucleoside monophosphate metabolic process	0.017982
17	cellular bud site selection	8.8203e-05	1.364
	cell morphogenesis	8.8203e-05
	G-protein signaling, coupled to cAMP nucleotide second messenger	0.040412
	cell growth	0.040412
	response to organic cyclic substance	0.040412
18	mitotic chromosome condensation	1.9444e-06	1.333
	positive regulation of transcription from RNA polymerase I promoter	3.1807e-05
	meiotic mismatch repair	4.0107e-05
	chromatin silencing	0.00015308
	meiosis I	0.00074186
	aspartate family amino acid biosynthetic process	0.0021757
	cell aging	0.029468
19	histidine biosynthetic process	0.00252	1.333
	folic acid and derivative biosynthetic process	0.00252
	oxidation reduction	0.0068704
	methionine biosynthetic process	0.0085421
	monocarboxylic acid metabolic process	0.0093637
	coenzyme metabolic process	0.010123
	sulfur amino acid biosynthetic process	0.010514
	purine nucleotide biosynthetic process	0.015371
	cofactor metabolic process	0.016329
	isocitrate metabolic process	0.036381
	pteridine and derivative biosynthetic process	0.040137
20	cell cycle arrest in response to pheromone	6.3911e-08	1.323
	mitochondrial fusion	1.2428e-07
	response to pheromone	0.00304
	mitochondrion inheritance	0.0049745
	vesicle docking during exocytosis	0.018935
	chromatin silencing at telomere	0.019699
21	amino acid metabolic process	0.0091755	1.25
	protein import into nucleus	0.0091755
	pyrimidine nucleotide biosynthetic process	0.0099889
22	actin cortical patch localization	0.0062657	1.222
	negative regulation of Arp2/3 complex-mediated actin nucleation	0.043547
23	L-serine metabolic process	0.0011692	1.087
	protein import into mitochondrial intermembrane space	0.0077594
	unsaturated fatty acid biosynthetic process	0.030458
	cysteine biosynthetic process via cystathionine	0.030458
	amino acid and derivative metabolic process	0.029802
24	superoxide metabolic process	0.026191	1.067
	phosphorus metabolic process	0.026191
	oxygen and reactive oxygen species metabolic process	0.026191
26	5-phosphoribose 1-diphosphate biosynthetic process	0.00038585	1
	pentose biosynthetic process	0.00038585
	alcohol biosynthetic process	0.00050284
	cell wall organization and biogenesis	0.0024133
	ribonucleoside monophosphate metabolic process	0.0048073
	response to hydroperoxide	0.010284
	alcohol metabolic process	0.013742
	GDP-mannose biosynthetic process	0.016058
27	ribosomal large subunit biogenesis	0.0019477	1
28	protein amino acid deacetylation	9.0174e-06	1
29	fungal-type cell wall organization and biogenesis	1.0115e-06	1
30	protein targeting to mitochondrion	1.5232e-07	1
	protein import into mitochondrial inner membrane	1.5232e-07
	inner mitochondrial membrane organization and biogenesis	2.6917e-07
31	mitochondrial electron transport, cytochrome c to oxygen	1.4746e-07	1
	organelle ATP synthesis coupled electron transport	6.0258e-07
	respiratory electron transport chain	6.0258e-07
	oxidative phosphorylation	1.4795e-06
	cell death	0.0002039
32	retrograde vesicle-mediated transport, Golgi to ER	0.0010339	1
34	chromosome segregation	0.003036	1
35	phospholipid biosynthetic process	0.027144	1
	pheromone-dependent signal transduction during conjugation with cellular fusion	0.027144
	regulation of conjugation with cellular fusion	0.027144
	positive regulation of apoptosis	0.036719
	response to nutrient levels	0.046862
	osmosensory signaling pathway via Sho1 osmosensor	0.04824
36	DNA-dependent DNA replication	0.0002941	1
	DNA recombination	0.00038552
37	mitochondrial electron transport, succinate to ubiquinone	4.0398e-05	1
	tricarboxylic acid cycle	0.00037643
	acetyl-CoA catabolic process	0.00037643
	aerobic respiration	0.002914
39	ER to Golgi vesicle-mediated transport	8.4188e-05	1
	peroxisome degradation	0.012804
40	positive regulation of DNA replication during S phase	0.014215	1
41	electron transport chain	0.0009035	1
	cellular potassium ion homeostasis	0.012618
	mitochondrial membrane organization and biogenesis	0.027188
43	establishment of nucleus localization	0.0030015	0.75
	microtubule cytoskeleton organization and biogenesis	0.016455
46	mitotic sister chromatid cohesion	0.012454	0.75
	hydrogen peroxide catabolic process	0.029142
47	triacylglycerol mobilization	0.041149	0.75
	age-dependent response to reactive oxygen species during chronological cell aging	0.041149
	lysine biosynthetic process via aminoadipic acid	0.041149
	cellular copper ion homeostasis	0.041149
48	ribophagy	0.017466	0.75
