# Supplementary material for: A Network-Based Approach on Elucidating the Multi-Faceted Nature of Chronological Aging in S. cerevisiae
Source: PLoS One. 2011 Dec 21;6(12):e29284. doi: 10.1371/journal.pone.0029284 (PMC3244448; doi:10.1371/journal.pone.0029284)
Supplement: Table S11 — Comparison of the step-specific key proteins of Tor1p-Sir2p pair for tCAN and BioGrid Network. (XLS) [file pone.0029284.s015.xls]

## Sheet: Table S11
Table S11. Comparison of the step-specific key proteins of Tor1p-Sir2p pair for tCAN and BioGrid Network
tCAN	Is it present in the Key Protein Subset for Tor1p-Sir2p in BioGrid Network?	BioGrid Network	Is it present in the "heart" network obtained from linear path analysis to tCAN?			Are they present in the Key Protein Subset for Tor1p-Sir2p for whole ppi data in BIOGRID?
YDR129C	NO	YAR007C	NO			YES
YGL008C	NO	YBL002W	NO			YES
YGL158W	NO	YBL003C	NO			YES
YGR192C	NO	YBL032W	NO			YES
YGR218W	NO	YBL072C	NO			YES
YHR030C	NO	YBR009C	NO			YES
YAL005C	YES	YBR010W	NO			YES
YDL042C	YES	YBR081C	NO			YES
YDL229W	YES	YBR154C	NO			YES
YER133W	YES	YBR245C	NO			YES
YFR004W	YES	YDL014W	NO			YES
YFR028C	YES	YDL025C	NO			YES
YHR082C	YES	YDL140C	NO			YES
YIL035C	YES	YDR145W	NO			YES
YIR010W	YES	YDR171W	NO			YES
YJR066W	YES	YDR174W	NO			YES
YLL024C	YES	YDR224C	NO			YES
YLR096W	YES	YDR225W	NO			YES
YLR347C	YES	YDR227W	NO			YES
YNL189W	YES	YDR303C	NO			YES
YNL197C	YES	YDR381W	NO			NO
YOR061W	YES	YDR385W	NO			NO
YOR117W	YES	YDR432W	NO			NO
YPL031C	YES	YDR496C	NO			NO
YPL240C	YES	YDR510W	NO			NO
YPR010C	YES	YER151C	NO			NO
		YER164W	NO
		YER165W	NO
		YER177W	NO
		YGL105W	NO
		YGL122C	NO
		YGL245W	NO
		YGR086C	NO
		YGR097W	NO
		YGR103W	NO
		YGR162W	NO
		YGR270W	NO
		YHR027C	NO
		YHR099W	NO
		YHR200W	NO
		YJL076W	NO
		YJR063W	NO
		YKR010C	NO
		YLL039C	NO
		YLR019W	NO
		YLR150W	NO
		YLR175W	NO
		YLR197W	NO
		YLR249W	NO
		YLR293C	NO
		YLR442C	NO
		YML069W	NO
		YMR049C	NO
		YMR229C	NO
		YMR242C	NO
		YMR290C	NO
		YNL030W	NO
		YNL031C	NO
		YNL248C	NO
		YOL004W	NO
		YOL012C	NO
		YOL051W	NO
		YOR207C	NO
		YOR224C	NO
		YOR310C	NO
		YOR341W	NO
		YPL055C	NO
		YPL082C	NO
		YPL131W	NO
		YPL198W	NO
		YPL204W	NO
		YPL235W	NO
		YPR110C	NO
		YPR161C	NO
		YAL005C	YES
		YBR160W	YES
		YDL042C	YES
		YDL229W	YES
		YER125W	YES
		YER133W	YES
		YER148W	YES
		YFL039C	YES
		YFR004W	YES
		YFR028C	YES
		YGL207W	YES
		YGR252W	YES
		YHR082C	YES
		YHR135C	YES
		YIL035C	YES
		YIR010W	YES
		YJL095W	YES
		YJL187C	YES
		YJR066W	YES
		YLL024C	YES
		YLR096W	YES
		YLR347C	YES
		YML065W	YES
		YNL154C	YES
		YNL189W	YES
		YNL197C	YES
		YNR051C	YES
		YOR061W	YES
		YOR117W	YES
		YOR210W	YES
		YPL031C	YES
		YPL240C	YES
		YPR010C	YES
