# Supplementary material for: A Network-Based Approach on Elucidating the Multi-Faceted Nature of Chronological Aging in S. cerevisiae
Source: PLoS One. 2011 Dec 21;6(12):e29284. doi: 10.1371/journal.pone.0029284 (PMC3244448; doi:10.1371/journal.pone.0029284)
Supplement: Table S12 — GO process terms of the clusters of the "heart" network. (XLS) [file pone.0029284.s016.xls]

## Sheet: clusters of "heart" network
Table S12. GO process terms of the clusters of the "heart" network
1	response to acid/regulation of pH
2	rRNA processing
3	phosphate metabolic process
4	protein modification process
5	synthesis of the large ribosomal RNA (rRNA) transcript
6	protein import into/export from nucleus
7	regulation of nucleobase, nucleoside, nucleotide and nucleic acid metabolic process
8	response to stimulus/stress
9	Ras protein signal transduction
10	response to nutrient levels
11	mitotic cell cycle
12	regulation of transcription by chromatin organization
13	ER to Golgi vesicle-mediated transport
14	fungal-type cell wall organization
15	endocytosis/exocytosis
16	peroxisome organization
17	chromosome segregation
18	glucose metabolic/fermentation process
19	unknown
20	cell aging
21	cellular aldehyde metabolic process
